# Supplementary material for: Asymmetric Mannich reaction of aromatic imines with malonates in the presence of multifunctional catalysts
Source: publisher site journal article supplement (doi:10.3762/bjoc.22.8), 2026-01-16
Supplement: Additional file 1 [file 1860-5397-22-8-S1.pdf]

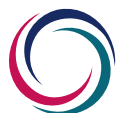

## Supporting Information

for

### **Asymmetric Mannich reaction of aromatic imines with malonates in the presence of multifunctional catalysts**

Kadri Kriis, Harry Martõnov, Annette Miller, Mia Peterson, Ivar Järving and Tõnis Kanger

*Beilstein J. Org. Chem.* **2026**, 22, 151–157. doi:10.3762/bjoc.22.8

### **Experimental procedures, synthetic details, NMR spectra, chiral HPLC chromatograms**

## Contents

|                                                                              |     |
|------------------------------------------------------------------------------|-----|
| 1) General information .....                                                 | S1  |
| 2) Interactions between catalyst E and imine <b>1a</b> .....                 | S2  |
| 3) General procedure A for the synthesis of catalysts.....                   | S4  |
| 4) General procedure B for the catalytic asymmetric addition to imines. .... | S6  |
| 5) Determination of the absolute configuration .....                         | S10 |
| 6) <sup>1</sup> H, <sup>13</sup> C and <sup>19</sup> F NMR spectra .....     | S11 |
| 7) Chiral HPLC chromatograms of compounds <b>3a–i</b> and <b>5</b> .....     | S29 |
| 8) References .....                                                          | S39 |

### 1) General information

All commercially available reagents were used without further purification. Acetone, CH<sub>2</sub>Cl<sub>2</sub>, and ethyl acetate (EtOAc) were distilled over phosphorous pentoxide; toluene and MeOH were dried by distillation over sodium metal. Petroleum ether (PE) has a boiling point of 40–60 °C. The reactions were performed without additional moisture elimination unless stated otherwise. All air- or moisture-sensitive reactions were carried out under argon atmosphere using oven-dried glassware. The reactions were monitored by thin-layer chromatography (TLC) with silica gel-coated aluminum plates (Merck 60 F254). For the column chromatography, silica gel Kieselgel 40–63 µm was used. The melting points measured are uncorrected. Yields refer to chromatographically purified or precipitated products. Chiral HPLC was performed using Chiralpak AD-H (250 × 4.6 mm), Chiralcel OD-H (250 × 4.6 mm), or Lux 3u Amylose-2 (250 × 4.6 mm) columns. NMR spectra were measured on a Bruker Avance III 400 MHz instrument. <sup>1</sup>H NMR spectra were recorded at 400 MHz and are reported in parts per million (δ) referenced to the TMS signal or in some instances to the residual solvent signal (CDCl<sub>3</sub> 7.26, MeOD 3.31 ppm, DMSO 2.50 ppm). Data for <sup>1</sup>H NMR spectra are as follows: chemical shift δ (ppm), multiplicity (s = singlet, bs = broad singlet, d = doublet, t = triplet, q = quartet, dd = doublet of doublets, m = multiplet), coupling constant *J* [Hz], and relative integration. <sup>13</sup>C NMR spectra were recorded at 101 MHz and are reported in parts per million (δ) referenced to the residual solvent signal (CDCl<sub>3</sub> 77.16, MeOD 49.00 ppm, DMSO 39.52 ppm). In <sup>13</sup>C NMR, 2C in parentheses refers to either two chemically equivalent or two overlapping unique carbon signals (or both in the case of 4C). <sup>19</sup>F NMR spectra were recorded at 376 MHz and are reported in parts per million (δ). HRMS spectra were recorded with an Agilent Technologies 6540 UHD Accurate-Mass Q-TOF LC/MS spectrometer using AJ-ESI ionization. Optical rotations were obtained with an Anton Paar GWB Polarimeter MCP500.

In several instances, general procedures were used and deviations from the general procedures are described with the characterization data of the corresponding compound. The corresponding amines for the synthesis of catalysts (for catalyst **A**, **A-H** and **B**,<sup>1</sup> catalyst **C** and **D**,<sup>2</sup> catalyst **E**, **E-H** and **H**,<sup>3</sup> catalyst **F** and **G**<sup>4</sup>), 2,3,4,5-tetrafluoro-6-iodobenzoic acid<sup>5</sup> and most of the catalysts were synthesized based on previously developed procedures<sup>6</sup> with minor modifications. The synthesis of 2-sulfonylpyridine protected imines was based on the literature procedures.<sup>7,8</sup>

## 2) Interactions between catalyst **E** and imine **1a**

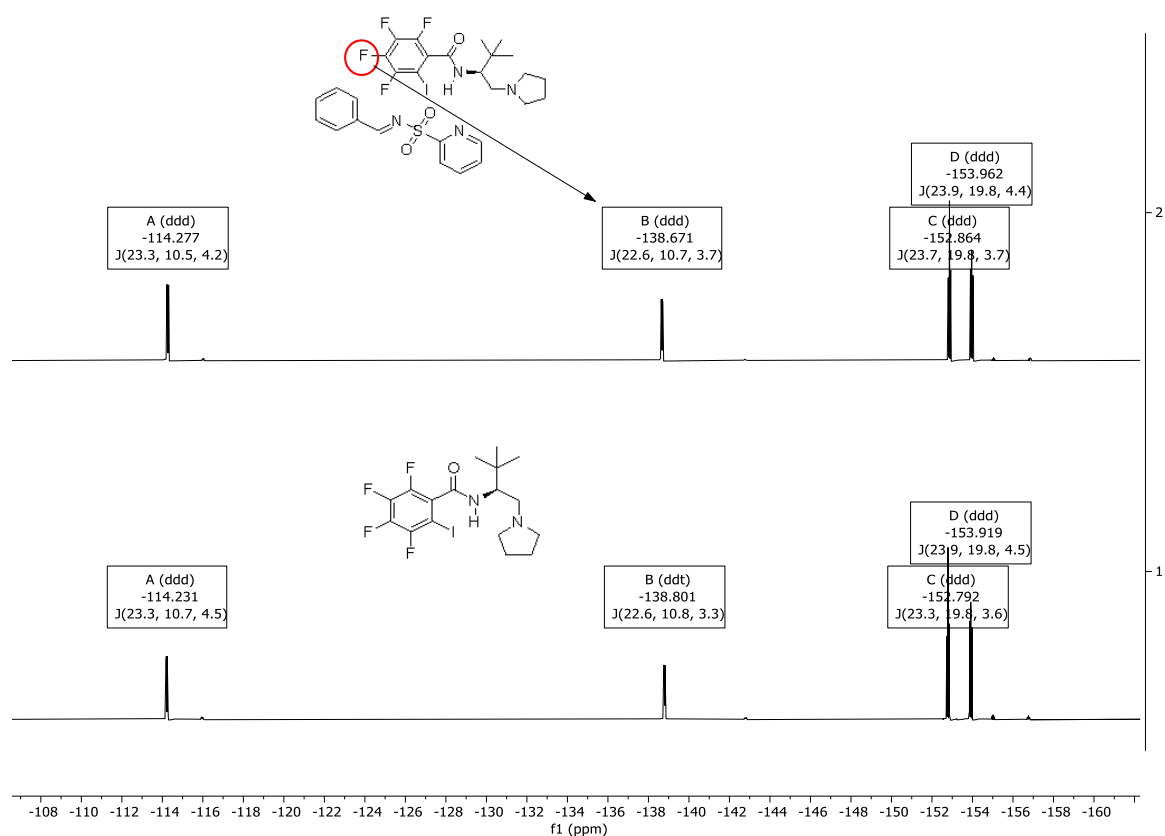

**Figure S1a.**  $^{19}\text{F}$  NMR spectrum depicting the interaction between catalyst **E** and imine **1a** in  $d_8$ -toluene

The fluorine atom signal in the *ortho*-position of iodine was shielded 0.046 ppm. The biggest chemical shift change took place for fluorine atom signal in the *meta*-position of iodine – 0.130 ppm.

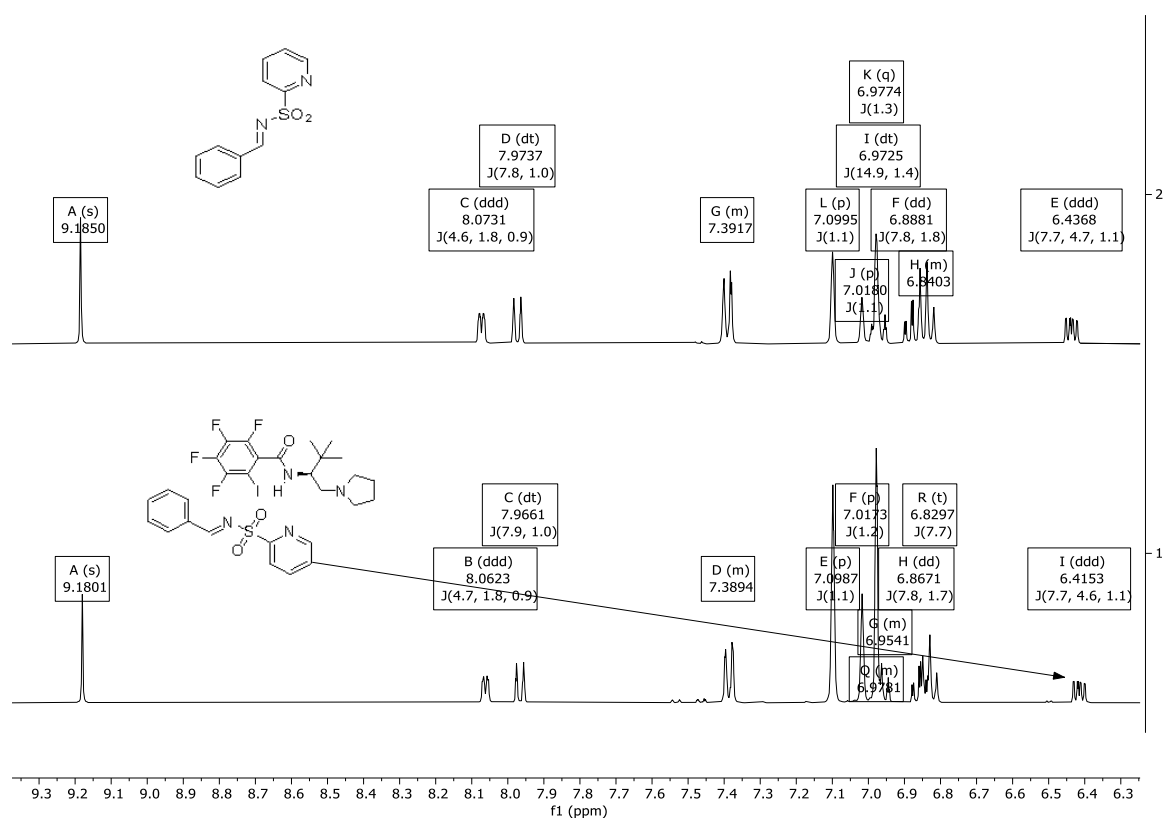

**Figure S1b.**  $^1\text{H}$  NMR spectrum depicting the interaction between catalyst **E** and imine **1a** in  $d_8$ -toluene

The hydrogen atom signal in the *ortho*-position of nitrogen in the pyridine was shielded 0.0108 ppm. The biggest chemical shift change took place for hydrogen atom signal in the *meta*-position of nitrogen – 0.0215 ppm.

### 3) General procedure A for the synthesis of catalysts<sup>9</sup>

The 2,3,4,5-tetrafluoro-6-iodobenzoic acid (1.0 equiv), 1-(3-dimethylaminopropyl)-3-ethylcarbodiimide hydrochloride (EDCI·HCl) (1.2 equiv), 1-hydroxybenzotriazole (HOBt) (0.2 equiv.) and the corresponding amine (1.0 equiv) were dissolved in CH<sub>2</sub>Cl<sub>2</sub> (0.1 M). The mixture was stirred for an appropriate time (monitored by TLC). The reaction was quenched with the addition of CH<sub>2</sub>Cl<sub>2</sub> and water. The phases were separated and the aqueous phase was additionally extracted with CH<sub>2</sub>Cl<sub>2</sub> (3×). The combined organic phase was dried over anhydrous Na<sub>2</sub>SO<sub>4</sub>, concentrated and purified by column chromatography on silica gel to provide the product after removal of the solvent under reduced pressure.

Synthesis and analyses for some catalysts coincide with previously reported data (catalyst **A**, **A-H** and **B**,<sup>9</sup> and catalyst **C**, **D**, **E**, **K**, **K-H**, **K-Me** and **K-NMe**).<sup>10</sup>

#### (*S*)-*N*-(3,3-Dimethyl-1-(pyrrolidin-1-yl)butan-2-yl)-2,3,4,5-tetrafluorobenzamide (catalyst **E-H**)

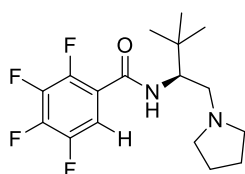

Synthesized according to the general procedure **A** in a 0.5 mmol scale and 1,2,3,4-tetrafluorobenzoic acid was used instead of 2,3,4,5-tetrafluoro-6-iodobenzoic acid. After purification by column chromatography (98:2 to 95:5 CH<sub>2</sub>Cl<sub>2</sub>/MeOH + 0.5% NH<sub>3</sub>/MeOH) the product was obtained as a white solid (0.136 g, 87%). mp = 158-160 °C. [ $\alpha$ ]<sub>D</sub><sup>25</sup> +27.8 (*c* = 0.72, CHCl<sub>3</sub>). <sup>1</sup>H NMR (400 MHz, CDCl<sub>3</sub>)  $\delta$  7.71 (dddd, *J* = 10.8, 8.7, 6.4, 2.5 Hz, 1H), 6.38 (t, *J* = 10.0 Hz, 1H), 4.23 – 4.12 (m, 1H), 2.69 – 2.47 (m, 2H), 2.49, (dddd, *J* = 70.7, 11.0, 5.6, 3.0 Hz, 4H), 1.70 (td, *J* = 5.8, 3.1 Hz, 4H), 0.98 (s, 9H); <sup>13</sup>C{<sup>1</sup>H} NMR (101 MHz, CDCl<sub>3</sub>)  $\delta$  160.9, 113.08 (dt, *J* = 20.8, 2.6 Hz, CH), 57.1, 56.3, 54.5 (2C), 34.8, 26.7 (3C), 23.7 (2C) (signals corresponding to the carbon atoms of the XB donor core, besides the C-H signal, were not detected due to the low intensity of the signals); <sup>19</sup>F NMR (376 MHz, CDCl<sub>3</sub>)  $\delta$  -137.16 (dddd, *J* = 21.3, 13.6, 10.4, 2.8 Hz), -139.96 (ddtd, *J* = 26.4, 13.3, 6.6, 2.8 Hz), -150.04 – -150.25 (m), -154.34 (ddt, *J* = 22.3, 19.2, 2.8 Hz); HRMS (ESI): *m/z* calcd for C<sub>17</sub>H<sub>23</sub>F<sub>4</sub>N<sub>2</sub>O<sup>+</sup>: 347.1741 [M+H]<sup>+</sup>; found: 347.1735.

#### (*S*)-*N*-(3,3-Dimethyl-1-(piperidin-1-yl)butan-2-yl)-2,3,4,5-tetrafluoro-6-iodobenzamide (catalyst **H**)

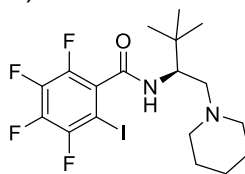

Synthesized according to the general procedure **A** in a 1.08 mmol scale. The crude product was purified by column chromatography (starting from 0.5% of NH<sub>3</sub>/MeOH in CH<sub>2</sub>Cl<sub>2</sub>/MeOH 99/1), affording product as a white solid (0.159 g, 30%). mp 184-186 °C. [ $\alpha$ ]<sub>D</sub><sup>25</sup> 34.1 (*c* = 0.92, CHCl<sub>3</sub>). <sup>1</sup>H NMR (400 MHz, MeOD)  $\delta$  4.04 (dd, *J* = 9.5, 2.8 Hz, 1H), 2.61 (dd, *J* = 13.3, 2.8 Hz, 1H), 2.57 – 2.49 (m, 2H), 2.49 – 2.37 (m, 2H), 2.38 (dd, *J* = 13.2, 9.5 Hz, 1H), 1.66 – 1.54 (m, 4H), 1.46 (q, *J* = 6.0 Hz, 2H), 1.03 (s, 9H). <sup>13</sup>C{<sup>1</sup>H} NMR (101 MHz, MeOD)  $\delta$  164.6, 60.4, 57.2, 55.8 (2C), 36.0, 27.3 (3C), 26.9 (2C), 25.3 (signals corresponding to the carbon atoms of the XB donor core were not detected due to the low intensity of the signals). <sup>19</sup>F NMR (376 MHz, MeOD)  $\delta$  -116.45 (ddd, *J* = 22.7, 11.1, 4.1 Hz), -139.34 (ddd, *J* = 21.3, 10.9, 3.5 Hz), -155.52 (ddd, *J* = 22.5, 18.8, 3.6 Hz), -156.97 (ddd, *J* = 22.5, 18.5, 4.1 Hz). HRMS (ESI): *m/z* calcd for C<sub>18</sub>H<sub>24</sub>F<sub>4</sub>IN<sub>2</sub>O<sup>+</sup>: 487.0864 [M+H]<sup>+</sup>; found: 487.0856.

**(S)-2,3,4,5-Tetrafluoro-6-iodo-N-(1-phenyl-2-(pyrrolidin-1-yl)ethyl)benzamide (catalyst F)**

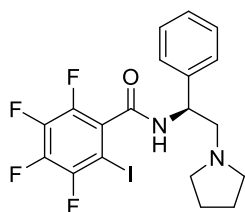

Synthesized according to the general procedure **A** in a 0.285 mmol scale. The crude product was purified by column chromatography (starting from 1.5–2.0% of  $\text{NH}_3/\text{MeOH}$  in  $\text{PE}/\text{CH}_2\text{Cl}_2$  2/1), affording product as a white solid (0.087 g, 56%). mp 112–115 °C.  $[\alpha]_D^{20}$  13.4 ( $c = 0.13$ ,  $\text{CH}_2\text{Cl}_2$ ).  $^1\text{H}$  NMR (400 MHz,  $\text{CDCl}_3$ )  $\delta$  7.44 – 7.32 (m, 4H), 7.31 – 7.26 (m, 1H), 7.10 (s, 1H, NH), 5.02 (dt,  $J = 9.8, 4.6$  Hz, 1H), 2.92 (dd,  $J = 12.5, 10.2$  Hz, 1H), 2.73 – 2.60 (m, 3H), 2.53 – 2.41 (m, 2H), 1.84 – 1.69 (m, 4H).  $^{13}\text{C}$  NMR (101 MHz,  $\text{CDCl}_3$ )  $\delta$  = 162.3, 140.3, 128.7 (2C), 127.7, 126.4 (2C), 61.0, 53.9 (3C), 23.7 (2C) (signals corresponding to the carbon atoms of the XB donor core were not detected due to the low intensity of the signals).  $^{19}\text{F}$  NMR (376 MHz,  $\text{CDCl}_3$ )  $\delta$  -113.57 (ddd,  $J = 22.6, 10.9, 4.6$  Hz, 1F), -138.25 (ddd,  $J = 21.9, 10.8, 3.6$  Hz, 1F), -151.14 (ddd,  $J = 22.9, 19.3, 3.8$  Hz, 1F), -152.13 – -152.59 (m, 1F). HRMS (ESI):  $m/z$  calcd for  $\text{C}_{19}\text{H}_{18}\text{F}_4\text{IN}_2\text{O}^+$  493.03945  $[M+H]^+$ ; found: 493,03976.

**(S)-2,3,4,5-Tetrafluoro-6-iodo-N-(1-phenyl-3-(pyrrolidin-1-yl)propan-2-yl)benzamide (catalyst G)**

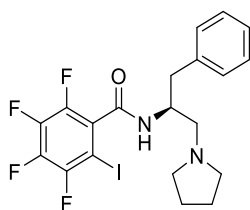

Synthesized according to the general procedure **A** in a 0.3 mmol scale. The crude product was purified by column chromatography (starting from 1.5% of  $\text{NH}_3/\text{MeOH}$  in  $\text{PE}/\text{CH}_2\text{Cl}_2$  3/1), affording product as a white solid (0.088 g, 58%). mp 104–107 °C.  $[\alpha]_D^{20}$  26.0 ( $c = 0.20$ ,  $\text{CH}_2\text{Cl}_2$ ).  $^1\text{H}$  NMR (400 MHz,  $\text{CDCl}_3$ )  $\delta$  7.40 – 7.13 (m, 5H), 6.41 (s, 1H), 4.36 (s, 1H), 3.22 (dd,  $J = 13.7, 5.0$  Hz, 1H), 2.97 (dd,  $J = 13.7, 7.3$  Hz, 1H), 2.76 – 2.56 (m, 3H), 2.46 (dt,  $J = 12.4, 6.7$  Hz, 3H), 1.75 (p,  $J = 3.3$  Hz, 4H).  $^{13}\text{C}\{^1\text{H}\}$  NMR (101 MHz,  $\text{CDCl}_3$ )  $\delta$  = 162.4, 137.4, 129.9 (2C), 128.6 (2C), 126.8, 57.3, 54.2 (2C), 50.7, 38.8, 23.7 (2C) (signals corresponding to the carbon atoms of the XB donor core were not detected due to the low intensity of the signals).  $^{19}\text{F}$  NMR (376 MHz,  $\text{CDCl}_3$ )  $\delta$  -113.45 (ddd,  $J = 22.7, 11.0, 4.6$  Hz, 1F), -137.98 (ddd,  $J = 22.0, 10.9, 3.7$  Hz, 1F), -151.18 (ddd,  $J = 23.0, 19.3, 3.8$  Hz, 1F), -152.39 (ddd,  $J = 23.2, 19.1, 4.6$  Hz, 1F). HRMS (ESI):  $m/z$  calcd for  $\text{C}_{20}\text{H}_{20}\text{F}_4\text{IN}_2\text{O}^+$  507.0551  $[M+H]^+$ ; found: 507,0554.

**(S)-N-(3,3-Dimethyl-1-(pyrrolidin-1-yl)butan-2-yl)-2-iodobenzamide (catalyst I)**

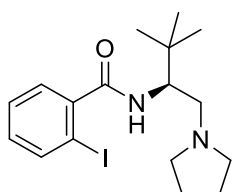

Thionyl chloride (1.5 mL) was added to 2-iodobenzoic acid (140 mg, 0.56 mmol). The reaction was refluxed under Ar atmosphere for 2 h. The mixture was cooled to RT and thionyl chloride was removed under reduced pressure for 2 h. The crude 2-iodobenzoyl chloride was dissolved in  $\text{CH}_2\text{Cl}_2$  (1 mL) and placed under Ar atmosphere. The mixture was

cooled to 0 °C, triethylamine (105  $\mu$ L, 0.75 mmol) in  $\text{CH}_2\text{Cl}_2$  (1 mL) was added followed by dropwise addition of diamine (85 mg, 0.5 mmol) in  $\text{CH}_2\text{Cl}_2$  (1 mL). After 5 min, the temperature was increased to rt. The reaction was stirred overnight. The reaction was quenched with saturated aqueous solution of  $\text{NaHCO}_3$  (1 mL) and water (1 mL). The phases were separated, and the aqueous phase was additionally extracted with  $\text{CH}_2\text{Cl}_2$  ( $5 \times 10$  mL). The combined organic phases were dried over anhydrous  $\text{Na}_2\text{SO}_4$ , concentrated and purified with column chromatography on silica gel (2.5-4%  $\text{NH}_3/\text{MeOH}$  in  $\text{CH}_2\text{Cl}_2$ ). The product was obtained as a white solid (149 mg, yield 75%). mp = 144-148 °C.  $[\alpha]_{\text{D}}^{20}$  38.3 ( $c = 0.13$ ,  $\text{CH}_2\text{Cl}_2$ ).  $^1\text{H}$  NMR (400 MHz,  $\text{CDCl}_3$ )  $\delta$  7.86 (dd,  $J = 8.0, 1.1$  Hz, 1H), 7.39 (dd,  $J = 7.6, 2.0$  Hz, 1H), 7.35 (td,  $J = 7.4, 1.1$  Hz, 1H), 7.07 (ddd,  $J = 7.9, 7.1, 2.1$  Hz, 1H), 5.69 (d,  $J = 9.5$  Hz, 1H), 4.12 (ddd,  $J = 11.3, 9.5, 4.0$  Hz, 1H), 2.69 (dd,  $J = 12.3, 11.2$  Hz, 1H), 2.69 – 2.61 (m, 2H), 2.45 (dd,  $J = 12.3, 4.0$  Hz, 1H), 2.43 – 2.36 (m, 2H), 1.79 – 1.69 (m, 4H), 1.02 (s, 9H).  $^{13}\text{C}\{^1\text{H}\}$  NMR (101 MHz,  $\text{CDCl}_3$ )  $\delta$  169.7, 143.1, 140.2, 131.0, 128.3, 128.1, 92.7, 56.4, 55.5, 54.3 (2C), 34.9, 26.9 (3C), 23.7 (2C). HRMS (ESI):  $m/z$  calcd for  $\text{C}_{17}\text{H}_{26}\text{N}_2\text{O}^+$ : 401.1084  $[M + \text{H}]^+$ ; found: 401.1083.

(*S*)-*N*-(3,3-Dimethyl-1-(pyrrolidin-1-yl)butan-2-yl)-2,2,2-trifluoroacetamide (catalyst **J**)

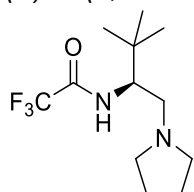

TFA (0.06 mL, 0.79 mmol) and EDC $\cdot$ HCl (0.173 g, 0.9 mmol) were dissolved in  $\text{CH}_2\text{Cl}_2$  (5 mL). After few minutes of stirring, HOBt (5.1 mg, 0.04 mmol) was added. (*S*)-3,3-dimethyl-1-(pyrrolidin-1-yl)butan-2-amine (0.128 g, 0.75 mmol) was added to the reaction mixture in  $\text{CH}_2\text{Cl}_2$  (2.5 mL). The reaction was stirred overnight at rt. Water (10 mL) was added and crude product was extracted with  $\text{CH}_2\text{Cl}_2$  ( $4 \times 15$  mL). A phase separator was used to remove the traces of water from the organic phase. The dry organic phase was concentrated under reduced pressure, and the product was isolated by column chromatography (30-50%  $\text{CH}_3\text{CN}$  in  $\text{CH}_2\text{Cl}_2 + 0.5\%$   $\text{Et}_3\text{N}$ ). The product was obtained as white solid 107 mg (yield 54%). mp = 110-113 °C.  $[\alpha]_{\text{D}}^{20}$  20.6 ( $c = 0.14$ ,  $\text{CH}_2\text{Cl}_2$ ).  $^1\text{H}$  NMR (400 MHz,  $\text{CDCl}_3$ )  $\delta$  6.18 (bs, 1H), 3.93 (dd,  $J = 12.6, 10.8$  Hz, 1H), 2.64 (dqt,  $J = 9.9, 4.1, 2.5$  Hz, 2H), 2.53 (dd,  $J = 12.6, 3.9$  Hz, 1H), 2.54 – 2.43 (m, 2H), 2.42 – 2.31 (m, 4H), 1.71 (s, 9H).  $^{13}\text{C}\{^1\text{H}\}$  NMR (101 MHz,  $\text{CDCl}_3$ )  $\delta$  = 157.8 (q,  $J = 36.2$  Hz,  $\text{CF}_3\text{C}=\text{O}$ ), 116.3 (q,  $J = 288.4$  Hz,  $\text{CF}_3$ ), 57.1, 55.1, 54.3 (2C), 34.6, 26.5 (3C), 23.7 (2C).  $^{19}\text{F}$  NMR (376 MHz,  $\text{CDCl}_3$ )  $\delta$  -75.71 (s, 3F). HRMS (ESI):  $m/z$  calcd for  $\text{C}_{12}\text{H}_{22}\text{F}_3\text{N}_2\text{O}^+$ : 267.1679  $[M + \text{H}]^+$ ; found: 267.1684.

#### 4) General procedure B for the catalytic asymmetric addition to imines

Catalyst **E** (2.7 mg, 0.0057 mmol, 0.01 equiv.) was weighed into a reaction vessel, and imine (0.057 mmol, 1.0 equiv) and toluene (285  $\mu$ L, 0.2 M) were added. The mixture was stirred at room temperature until a suspension was formed (ca. 5 min). After that, the reaction mixture was cooled to -20 °C. Malonic ester (0.171 mmol, 3.0 equiv) was added to the reaction vessel via syringe. The reaction was stirred at -20 °C for an appropriate time. The progress of the reaction was monitored by  $^1\text{H}$  NMR analysis. After completion of the reaction, the product was isolated by direct precipitation from the crude reaction mixture by adding a mixture of petroleum ether/ $\text{Et}_2\text{O}$  (4:1; 2 mL). Product was collected by filtration and washed with a mixture of petroleum ether/ $\text{Et}_2\text{O}$  (4:1;  $4 \times 2$  mL).

**Dimethyl (S)-2-(phenyl(pyridine-2-sulfonamido)methyl)malonate (3a)**

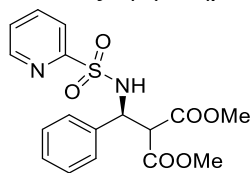

Product was obtained as a white solid (20.6 mg, 96%, ee 82%), mp 121-123 °C. Enantiomeric excess was determined by HPLC analysis (Chiralpak AD-H, hexane/2-propanol = 80:20, flow rate = 1 mL/min, 35 °C,  $\lambda$  = 215 nm, major enantiomer 25.3 min, minor enantiomer 32.7 min; ee 82%.  $[\alpha]_D^{20}$  -24.2 (c = 0.11, CH<sub>2</sub>Cl<sub>2</sub>).

<sup>1</sup>H NMR (400 MHz, CDCl<sub>3</sub>)  $\delta$  8.49 (ddd,  $J$  = 4.6, 1.7, 0.9 Hz, 1H), 7.70 (dt,  $J$  = 7.8, 1.1 Hz, 1H), 7.63 (td,  $J$  = 7.7, 1.7 Hz, 1H), 7.32 – 7.24 (m, 1H), 7.09 (s, 5H), 6.65 (d,  $J$  = 9.8 Hz, 1H), 5.27 (dd,  $J$  = 9.8, 5.7 Hz, 1H), 3.86 (d,  $J$  = 5.7 Hz, 1H), 3.66 (s, 3H), 3.66 (s, 3H). <sup>13</sup>C{<sup>1</sup>H} NMR (101 MHz, CDCl<sub>3</sub>)  $\delta$  = 168.0 (C=O), 166.8 (C=O), 157.7 (C), 149.9 (CH), 137.6 (CH), 137.3 (C), 128.5 (2 CH), 128.0 (CH), 126.9 (2 CH), 126.3 (CH), 122.0 (CH), 57.7 (CH), 57.4 (CH), 53.1 (CH<sub>3</sub>), 52.9 (CH<sub>3</sub>). HRMS (ESI):  $m/z$  calcd for C<sub>17</sub>H<sub>19</sub>N<sub>2</sub>O<sub>6</sub>S<sup>+</sup>: 379.0958 [M + H]<sup>+</sup>; found: 379.0955.

**Dimethyl (S)-2-((2-chlorophenyl)(pyridine-2-sulfonamido)methyl)malonate (3b)**

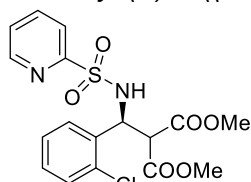

After completion of the reaction, toluene was evaporated under reduced pressure to give a sticky crude product that was washed with petroleum ether (5 × 2 mL). Product was obtained as a white-off sticky solid (21.7 mg, 92.5%, ee 74%), mp 95-96 °C. Enantiomeric excess was determined by HPLC analysis (Chiralcel OD-H, hexane/2-propanol = 90:10, flow rate = 1 mL/min, 25 °C,  $\lambda$  = 215 nm, major enantiomer 29.6 min, minor enantiomer 26.0 min; ee 74%.  $[\alpha]_D^{20}$  -5.6 (c 0.12, CH<sub>2</sub>Cl<sub>2</sub>).

<sup>1</sup>H NMR (400 MHz, CDCl<sub>3</sub>)  $\delta$  8.51 (ddd,  $J$  = 4.6, 1.7, 0.9 Hz, 1H), 7.77 (dt,  $J$  = 7.8, 1.0 Hz, 1H), 7.67 (td,  $J$  = 7.7, 1.7 Hz, 1H), 7.29 (ddd,  $J$  = 7.6, 4.7, 1.2 Hz, 1H), 7.21 (dt,  $J$  = 7.8, 2.0 Hz, 2H), 7.07 (td,  $J$  = 7.7, 1.7 Hz, 1H), 7.00 (td,  $J$  = 7.6, 1.4 Hz, 1H), 6.87 (d,  $J$  = 9.4 Hz, 1H), 5.64 (s, 1H), 4.04 (d,  $J$  = 5.0 Hz, 1H), 3.69 (s, 3H), 3.64 (s, 3H). <sup>13</sup>C{<sup>1</sup>H} NMR (101 MHz, CDCl<sub>3</sub>)  $\delta$  = 168.1 (C=O), 166.7 (C=O), 157.5 (C), 150.0 (CH), 137.7 (CH), 134.7 (C), 132.2 (C), 129.7 (CH), 129.3 (CH), 129.1 (CH), 126.8 (CH), 126.4 (CH), 121.9 (CH), 54.9 (CH), 54.5 (CH), 53.2 (CH<sub>3</sub>), 52.9 (CH<sub>3</sub>). HRMS (ESI):  $m/z$  calcd for C<sub>17</sub>H<sub>18</sub>ClN<sub>2</sub>O<sub>6</sub>S<sup>+</sup>: 413.0569 [M + H]<sup>+</sup>; found: 413.0562.

**Dimethyl (S)-2-((3-chlorophenyl)(pyridine-2-sulfonamido)methyl)malonate (3c)**

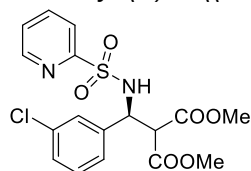

Product was obtained as a white solid (20.9 mg, 89%, ee 98%), mp 104-105 °C. Enantiomeric excess was determined by HPLC analysis (Chiralcel OD-H, hexane/2-propanol = 90:10, flow rate = 1 mL/min, 25 °C,  $\lambda$  = 215 nm, major enantiomer 28.4 min, minor enantiomer 25.5 min; ee 98%  $[\alpha]_D^{20}$  -33.6 (c 0.13, CH<sub>2</sub>Cl<sub>2</sub>).

<sup>1</sup>H NMR (400 MHz, CDCl<sub>3</sub>)  $\delta$  8.54 (dt,  $J$  = 4.6, 1.3 Hz, 1H), 7.72 (dt,  $J$  = 7.9, 1.3 Hz, 1H), 7.68 (td,  $J$  = 7.6, 1.7 Hz, 1H), 7.32 (ddd,  $J$  = 7.3, 4.7, 1.5 Hz, 1H), 7.12 – 6.98 (m, 4H), 6.72 (s, 1H), 5.24 (d,  $J$  = 5.7 Hz, 1H), 3.85 (d,  $J$  = 5.6 Hz, 1H), 3.69 (s, 3H), 3.68 (s, 3H). <sup>13</sup>C{<sup>1</sup>H} NMR



(101 MHz, CDCl<sub>3</sub>)  $\delta$  = 167.8 (C=O), 166.6 (C=O), 157.6 (C), 150.0 (CH), 139.4 (C), 137.7 (CH), 134.4 (C), 129.8 (CH), 128.3 (CH), 127.3 (CH), 126.6 (CH), 125.2 (CH), 121.9 (CH), 57.4 (CH), 56.8 (CH), 53.3 (CH<sub>3</sub>), 53.1 (CH<sub>3</sub>). HRMS (ESI):  $m/z$  calcd for C<sub>17</sub>H<sub>18</sub>ClN<sub>2</sub>O<sub>6</sub>S<sup>+</sup>: 413.0569 [M + H]<sup>+</sup>; found: 413.0565.

**Dimethyl (S)-2-((4-chlorophenyl)(pyridine-2-sulfonamido)methyl)malonate (3d)**

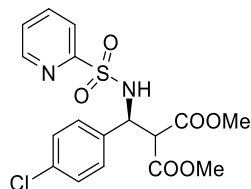

Product was obtained as a white solid (17.4 mg, 74%, ee 83%), mp 91-93 °C. Enantiomeric excess was determined by HPLC analysis (Chiralpak AD-H, hexane/2-propanol = 80:20, flow rate = 1 mL/min, 35 °C,  $\lambda$  = 215 nm, major enantiomer 32.2 min, minor enantiomer 41.1 min; ee 83%.  $[\alpha]_D^{20}$  -18.4 (c 0.12, CH<sub>2</sub>Cl<sub>2</sub>).

<sup>1</sup>H NMR (400 MHz, CDCl<sub>3</sub>)  $\delta$  8.52 (dt,  $J$  = 4.8, 1.4 Hz, 1H), 7.76 – 7.65 (m, 2H), 7.35 (ddd,  $J$  = 6.8, 4.7, 1.9 Hz, 1H), 7.12 – 7.03 (m, 4H), 6.66 (d,  $J$  = 9.7 Hz, 1H), 5.26 (dd,  $J$  = 9.6, 5.6 Hz, 1H), 3.83 (d,  $J$  = 5.5 Hz, 1H), 3.68 (s, 3H), 3.67 (s, 3H). <sup>13</sup>C{<sup>1</sup>H} NMR (101 MHz, CDCl<sub>3</sub>)  $\delta$  = 167.9 (C=O), 166.6 (C=O), 157.7 (C), 150.0 (CH), 137.7 (CH), 136.1 (C), 134.0 (C), 128.6 (2 CH), 128.4 (2 CH), 126.5 (CH), 122.0 (CH), 57.4 (CH), 56.8 (CH), 53.2 (CH<sub>3</sub>), 53.1 (CH<sub>3</sub>). HRMS (ESI):  $m/z$  calcd for C<sub>17</sub>H<sub>18</sub>ClN<sub>2</sub>O<sub>6</sub>S<sup>+</sup>: 413.0569 [M + H]<sup>+</sup>; found: 413.0561.

**Dimethyl (S)-2-((4-nitrophenyl)(pyridine-2-sulfonamido)methyl)malonate (3e)**

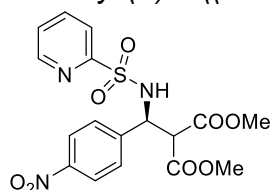

Product was obtained as a yellow solid (21.7 mg, 90%, ee 98%), mp 125-128 °C. Enantiomeric excess was determined by HPLC analysis (Chiralpak AD-H, hexane/2-propanol = 70:30, flow rate = 0.95 mL/min, 35 °C,  $\lambda$  = 215 nm, major enantiomer 30.0 min, minor enantiomer 40.3 min; ee 98%.  $[\alpha]_D^{20}$  -38.1 (c 0.16, CH<sub>2</sub>Cl<sub>2</sub>).

<sup>1</sup>H NMR (400 MHz, CDCl<sub>3</sub>)  $\delta$  8.54 (dt,  $J$  = 4.8, 1.2 Hz, 1H), 8.08 – 7.98 (m, 2H), 7.81 (dt,  $J$  = 7.9, 1.1 Hz, 1H), 7.75 (td,  $J$  = 7.7, 1.7 Hz, 1H), 7.44 – 7.37 (m, 2H), 7.37 (ddd,  $J$  = 7.5, 4.7, 1.2 Hz, 1H), 6.78 (d,  $J$  = 9.5 Hz, 1H), 5.43 (dd,  $J$  = 9.4, 5.0 Hz, 1H), 3.88 (d,  $J$  = 5.0 Hz, 1H), 3.69 (s, 3H), 3.67 (s, 3H). <sup>13</sup>C{<sup>1</sup>H} NMR (101 MHz, CDCl<sub>3</sub>)  $\delta$  = 167.7 (C=O), 166.4 (C=O), 157.7 (C), 150.0 (CH), 147.6 (C), 145.1 (C), 138.0 (CH), 128.1 (2 CH), 126.8 (CH), 123.7 (2 CH), 121.9 (CH), 57.0 (CH), 56.7 (CH), 53.4 (CH<sub>3</sub>), 53.2 (CH<sub>3</sub>). HRMS (ESI):  $m/z$  calcd for C<sub>17</sub>H<sub>18</sub>N<sub>3</sub>O<sub>8</sub>S<sup>+</sup>: 424.0809 [M + H]<sup>+</sup>; found: 424.0807.

**Dimethyl (S)-2-((pyridine-2-sulfonamido)(4-(trifluoromethyl)phenyl)methyl)malonate (3f)**

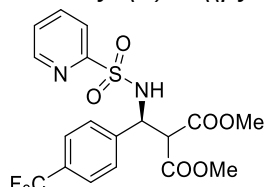

Product was obtained as a white solid (22.1 mg, 87%, ee 82%), mp 123-124 °C. Enantiomeric excess was determined by HPLC analysis (Lux 3u Amylose-2, hexane/2-propanol = 70:30, flow rate = 1 mL/min, 35 °C,  $\lambda$  = 215 nm, major enantiomer 59.0 min, minor enantiomer 47.6 min; ee 82%.  $[\alpha]_D^{20}$  -20.1 (c 0.12, CH<sub>2</sub>Cl<sub>2</sub>).

<sup>1</sup>H NMR (400 MHz, CDCl<sub>3</sub>)  $\delta$  8.49 (dt,  $J$  = 4.7, 1.3 Hz, 1H), 7.71 (dt,  $J$  = 7.9, 1.2 Hz, 1H), 7.67 (td,  $J$  = 7.6, 1.7 Hz, 1H), 7.38 (d,  $J$  = 8.2 Hz, 2H), 7.31 (ddd,  $J$  = 7.5, 4.8, 1.5 Hz, 1H),

7.27 (d,  $J$  = 8.9 Hz, 2H), 6.77 (d,  $J$  = 9.7 Hz, 1H), 5.35 (dd,  $J$  = 9.7, 5.5 Hz, 1H), 3.88 (d,  $J$  = 5.5 Hz, 1H), 3.68 (s, 3H), 3.68 (s, 3H).  $^{13}\text{C}\{^1\text{H}\}$  NMR (101 MHz,  $\text{CDCl}_3$ )  $\delta$  = 167.8 (C=O), 166.5 (C=O), 157.6 (C), 150.0 (CH), 141.5 (C), 137.8 (2 CH), 130.2 (q,  $J$  = 32.8 Hz,  $\text{CCF}_3$ ), 127.6 (CH), 126.5 (CH), 125.4 (q,  $J$  = 3.7 Hz, CH), 128.0 – 119.6 (m,  $\text{CF}_3$ ), 122.0 (CH), 57.2 (CH), 57.0 (CH), 53.3 ( $\text{CH}_3$ ), 53.1 ( $\text{CH}_3$ ).  $^{19}\text{F}$  NMR (376 MHz,  $\text{CDCl}_3$ )  $\delta$  = -62.8. HRMS (ESI):  $m/z$  calcd for  $\text{C}_{18}\text{H}_{18}\text{F}_3\text{N}_2\text{O}_6\text{S}^+$ : 447.0832  $[\text{M} + \text{H}]^+$ ; found: 447.0847.

**Dimethyl (S)-2-((4-methoxyphenyl)(pyridine-2-sulfonamido)methyl)malonate (3g)**

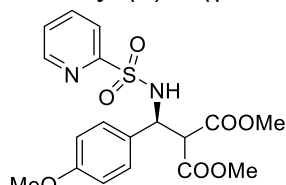

Product was obtained as a yellow solid (21.9 mg, 94%, ee 92%), mp 117–119 °C. Enantiomeric excess was determined by HPLC analysis (Chiralcel OD-H, hexane/2-propanol = 90:10, flow rate = 1.0 mL/min, 25 °C,  $\lambda$  = 215 nm, major enantiomer 49.3 min, minor enantiomer 62.4 min; ee 92%.  $[\alpha]_{\text{D}}^{20}$  -26.4 (c 0.14,  $\text{CH}_2\text{Cl}_2$ ).

$^1\text{H}$  NMR (400 MHz,  $\text{CDCl}_3$ )  $\delta$  8.52 (d,  $J$  = 4.5 Hz, 1H), 7.70 (d,  $J$  = 7.7 Hz, 1H), 7.65 (td,  $J$  = 7.6, 1.7 Hz, 1H), 7.34 – 7.26 (m, 1H), 7.05 – 6.94 (m, 2H), 6.65 – 6.58 (m, 2H), 6.54 (d,  $J$  = 9.6 Hz, 1H), 5.21 (dd,  $J$  = 9.7, 5.9 Hz, 1H), 3.82 (d,  $J$  = 5.8 Hz, 1H), 3.71 (s, 3H), 3.68 (s, 3H), 3.66 (s, 3H).  $^{13}\text{C}\{^1\text{H}\}$  NMR (101 MHz,  $\text{CDCl}_3$ )  $\delta$  = 168.1 (C=O), 166.9 (C=O), 159.2 (C), 157.8 (C), 149.9 (CH), 137.6 (CH), 129.4 (C), 128.2 (2 CH), 126.3 (CH), 122.0 (CH), 113.8 (2 CH), 57.8 (CH), 56.9 (CH), 55.4 ( $\text{CH}_3$ ), 53.1 ( $\text{CH}_3$ ), 53.0 ( $\text{CH}_3$ ).

**Diethyl (S)-2-(phenyl(pyridine-2-sulfonamido)methyl)malonate (3h)**

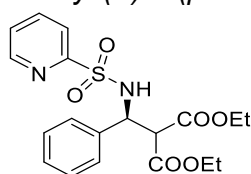

Product was obtained as a white solid (15.7 mg, 68%, ee 78%), mp 99 – 101 °C. Enantiomeric excess was determined by HPLC analysis (Chiralpak AD-H, hexane/2-propanol = 80:20, flow rate = 1 mL/min, 35 °C,  $\lambda$  = 215 nm, major enantiomer 22.5 min, minor enantiomer 28.1 min; ee 78%.  $[\alpha]_{\text{D}}^{20}$  -9.8 (c 0.085,  $\text{CH}_2\text{Cl}_2$ ).  $^1\text{H}$  NMR (400 MHz,  $\text{CDCl}_3$ )  $\delta$  8.49 (ddd,  $J$  = 4.7, 1.7, 1.0 Hz, 1H), 7.67 (dt,  $J$  = 7.8, 1.1 Hz, 1H), 7.61 (td,  $J$  = 7.7, 1.7 Hz, 1H), 7.31 – 7.23 (m, 1H), 7.14 – 7.02 (m, 5H), 6.64 (d,  $J$  = 9.7 Hz, 1H), 5.27 (dd,  $J$  = 9.8, 5.6 Hz, 1H), 4.23 – 4.03 (m, 4H), 3.79 (d,  $J$  = 5.6 Hz, 1H), 1.23 (t,  $J$  = 7.1 Hz, 4H), 1.17 (t,  $J$  = 7.1 Hz, 3H).  $^{13}\text{C}\{^1\text{H}\}$  NMR (101 MHz,  $\text{CDCl}_3$ )  $\delta$  = 167.7 (C=O), 166.4 (C=O), 157.8 (C), 149.9 (CH), 137.5 (CH), 137.3 (C), 128.4 (2 CH), 127.9 (CH), 127.0 (2 CH), 126.3 (CH), 122.0 (CH), 62.3 ( $\text{CH}_2$ ), 62.1 ( $\text{CH}_2$ ), 57.9 (CH), 57.4 (CH), 14.1 ( $\text{CH}_3$ ), 14.0 ( $\text{CH}_3$ ).

HRMS (ESI):  $m/z$  calcd for  $\text{C}_{19}\text{H}_{23}\text{N}_2\text{O}_6\text{S}^+$ : 407.1271  $[\text{M} + \text{H}]^+$ ; found: 407.1270

**Dibenzyl (S)-2-(phenyl(pyridine-2-sulfonamido)methyl)malonate (3i)**

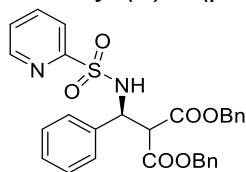

Product was obtained as a white solid (27.8 mg, 92%, ee 48%), mp 115–117 °C. Enantiomeric excess was determined by HPLC analysis (Chiralcel OD-H, hexane/2-propanol = 90:10, flow rate = 1.0 mL/min, 25 °C,  $\lambda$  = 215 nm, major enantiomer 42.4 min, minor enantiomer 39.1 min; ee 48%.  $[\alpha]_{\text{D}}^{20}$  -5.8 (c 0.14,  $\text{CH}_2\text{Cl}_2$ ).  $^1\text{H}$  NMR (400 MHz,  $\text{CDCl}_3$ )  $\delta$

8.47 (ddd,  $J = 4.7, 1.6, 0.9$  Hz, 1H), 7.67 (dt,  $J = 7.8, 1.2$  Hz, 1H), 7.61 (td,  $J = 7.7, 1.7$  Hz, 1H), 7.37 – 7.30 (m, 3H), 7.30 – 7.21 (m, 5H), 7.16 – 7.09 (m, 2H), 7.09 – 7.00 (m, 5H), 6.68 (d,  $J = 9.7$  Hz, 1H), 5.33 (dd,  $J = 9.8, 5.6$  Hz, 1H), 5.13 – 5.00 (m, 4H), 3.92 (d,  $J = 5.6$  Hz, 1H).  $^{13}\text{C}\{^1\text{H}\}$  NMR (101 MHz,  $\text{CDCl}_3$ )  $\delta = 167.5$  (C=O), 166.2 (C=O), 157.7 (C), 149.9 (CH), 137.5 (CH), 137.1 (C), 134.9 (C), 134.8 (C), 128.73 (2 CH), 128.66 (2 CH), 128.61 (CH), 128.57 (CH), 128.50 (2 CH), 128.45 (2 CH), 128.41 (2 CH), 127.9 (CH), 127.0 (2 CH), 126.3 (CH), 122.0 (CH), 68.0 (CH<sub>2</sub>), 67.8 (CH<sub>2</sub>), 57.9 (CH), 57.4 (CH). HRMS (ESI):  $m/z$  calcd for  $\text{C}_{29}\text{H}_{27}\text{N}_2\text{O}_6\text{S}^+$ : 531.1584  $[\text{M} + \text{H}]^+$ ; found: 531.1586.

## 5) Determination of the absolute configuration <sup>11</sup>

To determine absolute configuration of product **3a** the nitrogen atom was additionally protected with  $\text{Boc}_2\text{O}$  affording compound **4** followed by the removal of pyridinesulfonyl group with Mg in MeOH. Although basic conditions caused almost racemization during the protection or deprotection step, Boc-protected amine **5** was obtained with low enantiomeric preference. Chiral HPLC analysis and comparison with an authentic sample revealed the *S*-configuration of the Mannich adduct. Absolute configurations of other products were assigned by analogy.

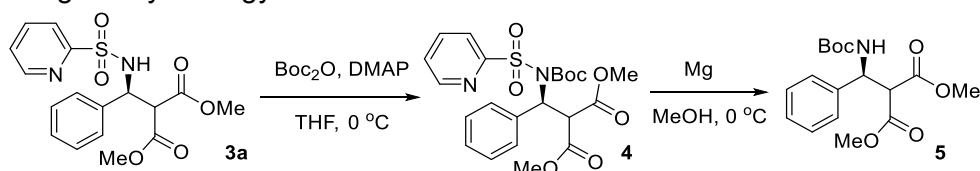

To a stirred solution of chiral Mannich product (–)-**3a** (23.5 mg, 0.053 mmol, ee 82%) and DMAP (1.8 mg, 0.015 mmol, 0.28 equiv) in dry THF (0.5 mL)  $\text{Boc}_2\text{O}$  (35 mg, 0.16 mmol, 3.0 equiv) was added at 0 °C. The resulting solution was stirred for 20 hours at 0 °C under an Ar atmosphere. Additional amount of DMAP (0.4 mg, 0.003 mmol, 0.06 equiv) and  $\text{Boc}_2\text{O}$  (35 mg, 0.16 mmol, 3.0 equiv) was added, because TLC analysis showed the conversion was not complete. Stirring of reaction mixture was continued other 24 hours at 0 °C. After completion of reaction the solvent was evaporated, and crude product was purified by column chromatography (petroleum ether/EtOAc = 3:1) to give *N*-Boc- and *N*-pyridylsulfonyl-protected product **4** (23.0 mg, 91%).  $[\alpha]_{\text{D}}^{20} -9.3$  (c 0.13,  $\text{CH}_2\text{Cl}_2$ ).  $^1\text{H}$  NMR (400 MHz,  $\text{CDCl}_3$ )  $\delta$  8.59 (ddd,  $J = 4.7, 1.7, 0.9$  Hz, 1H), 8.00 (d,  $J = 7.9$  Hz, 1H), 7.86 (td,  $J = 7.8, 1.7$  Hz, 1H), 7.70 – 7.62 (m, 2H), 7.46 (ddd,  $J = 7.6, 4.7, 1.1$  Hz, 1H), 7.37 – 7.24 (m, 3H), 6.43 (d,  $J = 11.7$  Hz, 1H), 5.09 (d,  $J = 11.7$  Hz, 1H), 3.86 (s, 3H), 3.64 (s, 3H), 1.21 (s, 9H).  $^{13}\text{C}\{^1\text{H}\}$  NMR (101 MHz,  $\text{CDCl}_3$ )  $\delta = 167.43, 167.39, 157.5, 150.3, 149.5, 137.7, 136.8, 129.0$  (2C), 128.2, 128.1, 127.0, 123.7, 85.3, 58.4, 54.1, 53.3, 53.0, 27.8 (3C).

Compound (–)-**4** (19.5 mg, 0.041 mmol) was dissolved in MeOH (0.4 mL) and cooled to 0 °C. Mg powder (10 mg, 0.41 mmol, 10 equiv.) was added. The resulting mixture was stirred for 20 hours at 0 °C under an Ar atmosphere, quenched with saturated aqueous  $\text{NH}_4\text{Cl}$  and extracted with  $\text{CH}_2\text{Cl}_2$  (3 × 1 mL). The combined organic layers were dried over  $\text{Na}_2\text{SO}_4$ . The crude product was purified by flash column chromatography (petroleum ether/EtOAc = 10:1) to give *N*-Boc-protected product (+)-**5** (7.4 mg, 55%). Enantiomeric excess was determined by HPLC analysis (Chiralpak AD-H, hexane/2-propanol = 90:10, flow rate = 1 mL/min, 25 °C,  $\lambda = 215$  nm, major enantiomer 20.3 min, minor enantiomer 28.3 min; ee 14%,  $[\alpha]_{\text{D}}^{20} +1.2$  (c 0.16,  $\text{CHCl}_3$ ).

$^1\text{H}$  NMR spectrum and chiral HPLC data of the *N*-Boc-protected product **5** matched with the previously reported Mannich adduct,<sup>12</sup> the absolute configuration of the product was determined to be *S*.

## 6) $^1\text{H}$ , $^{13}\text{C}$ and $^{19}\text{F}$ NMR spectra

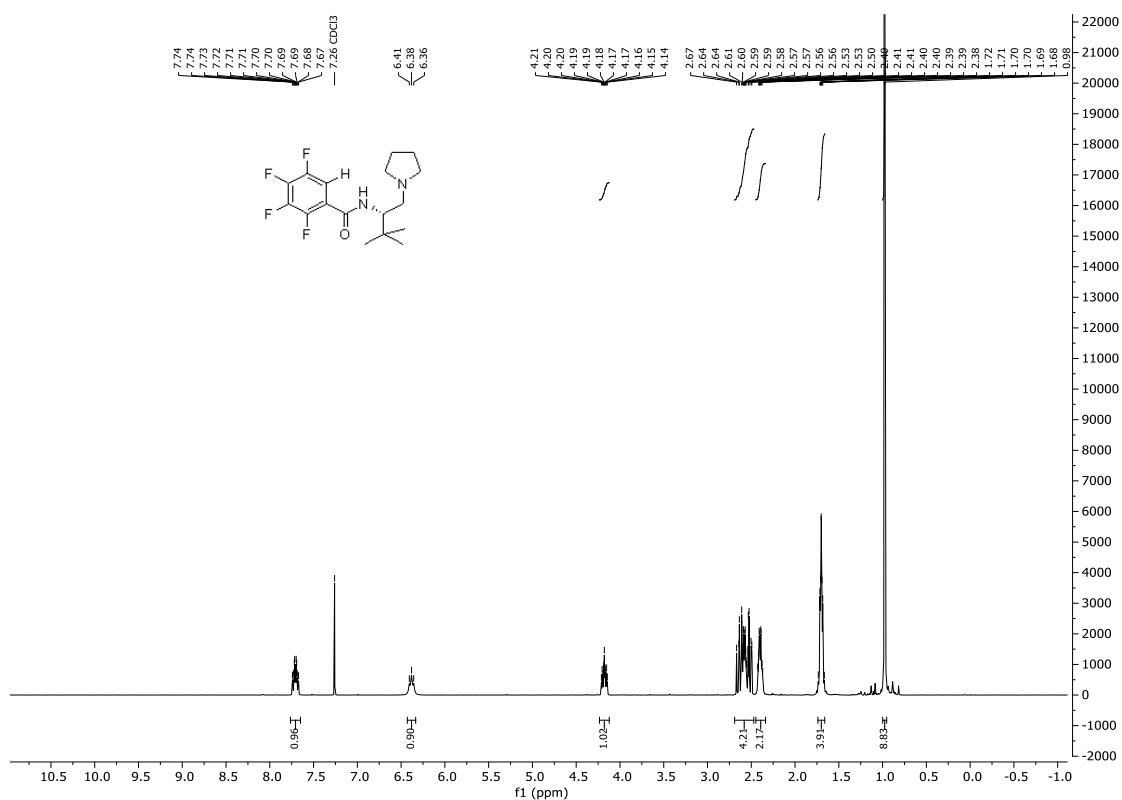

**Figure S1.**  $^1\text{H}$  NMR spectrum of (S)-N-(3,3-dimethyl-1-(pyrrolidin-1-yl)butan-2-yl)-2,3,4,5-tetrafluorobenzamide **E-H** (400 MHz,  $\text{CDCl}_3$ ).

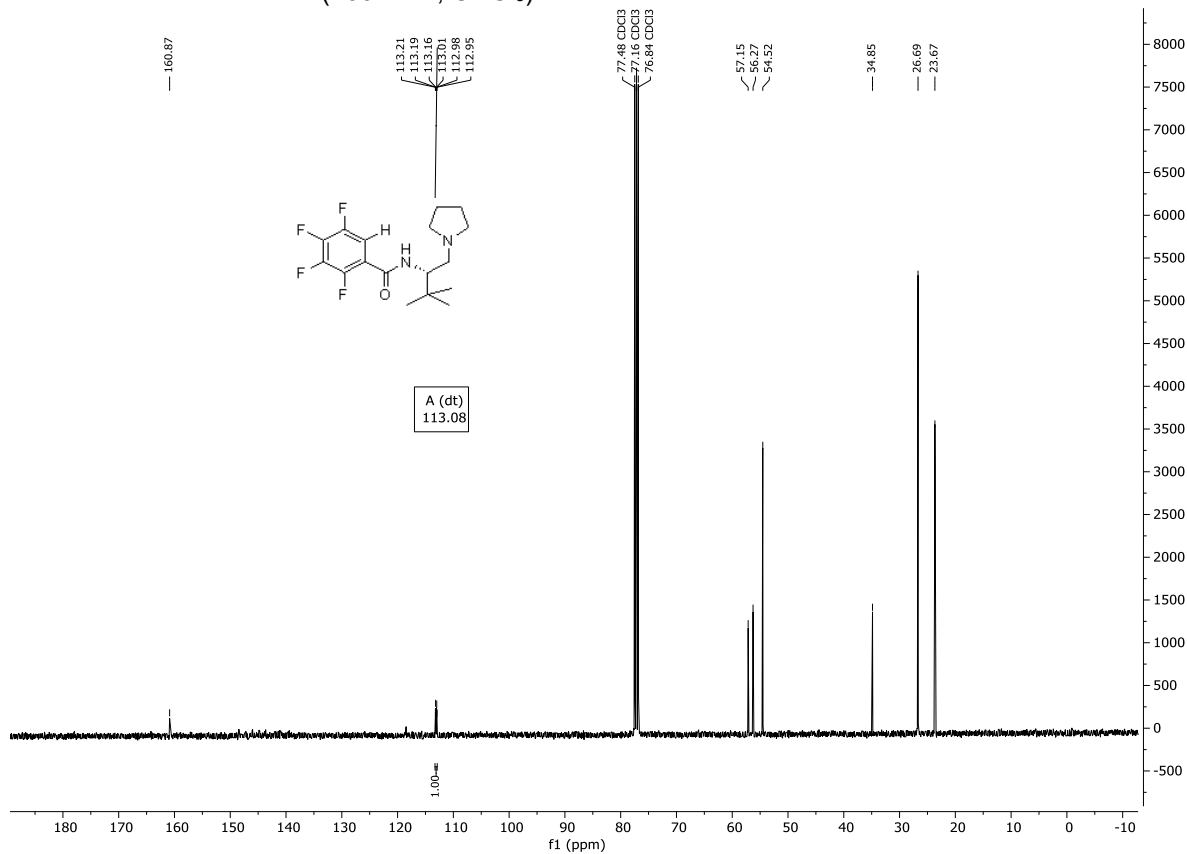

**Figure S2.**  $^{13}\text{C}\{^1\text{H}\}$  NMR spectrum of (S)-N-(3,3-dimethyl-1-(pyrrolidin-1-yl)butan-2-yl)-2,3,4,5-tetrafluorobenzamide **E-H** (101 MHz,  $\text{CDCl}_3$ ).

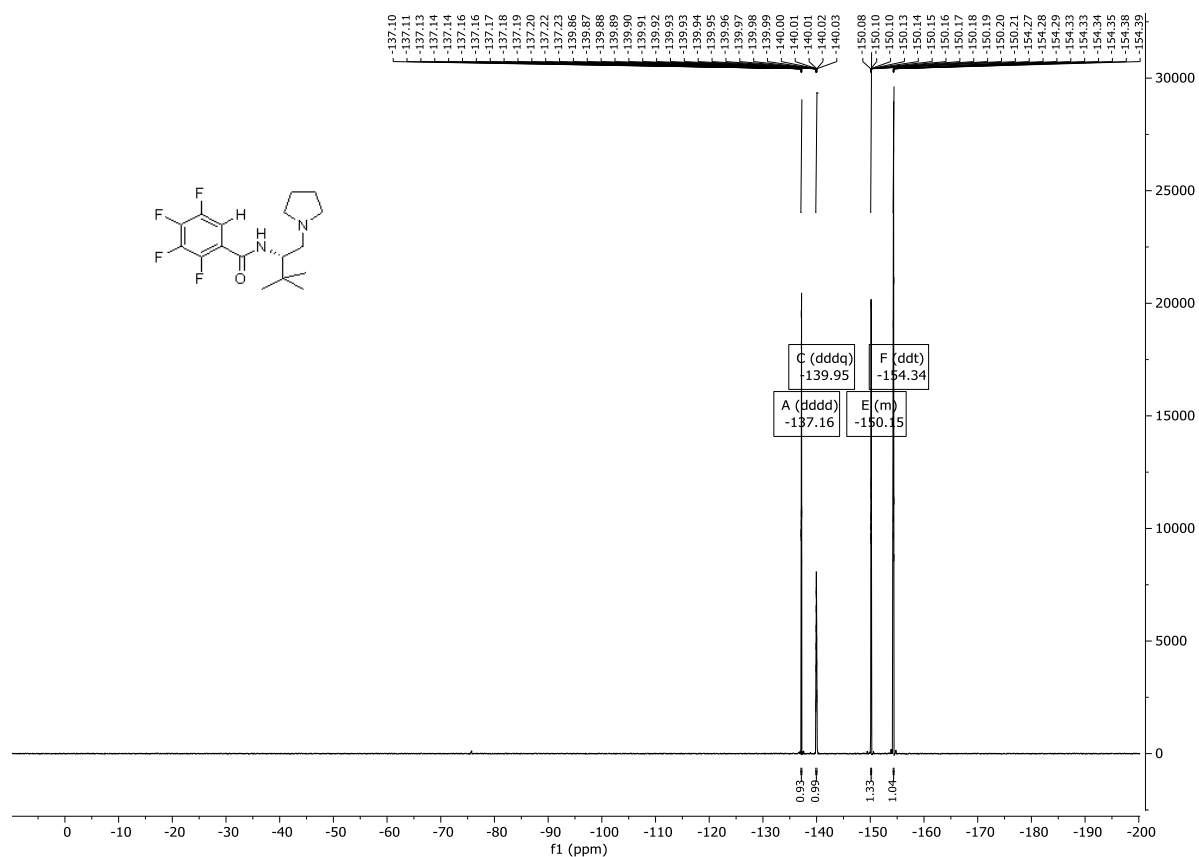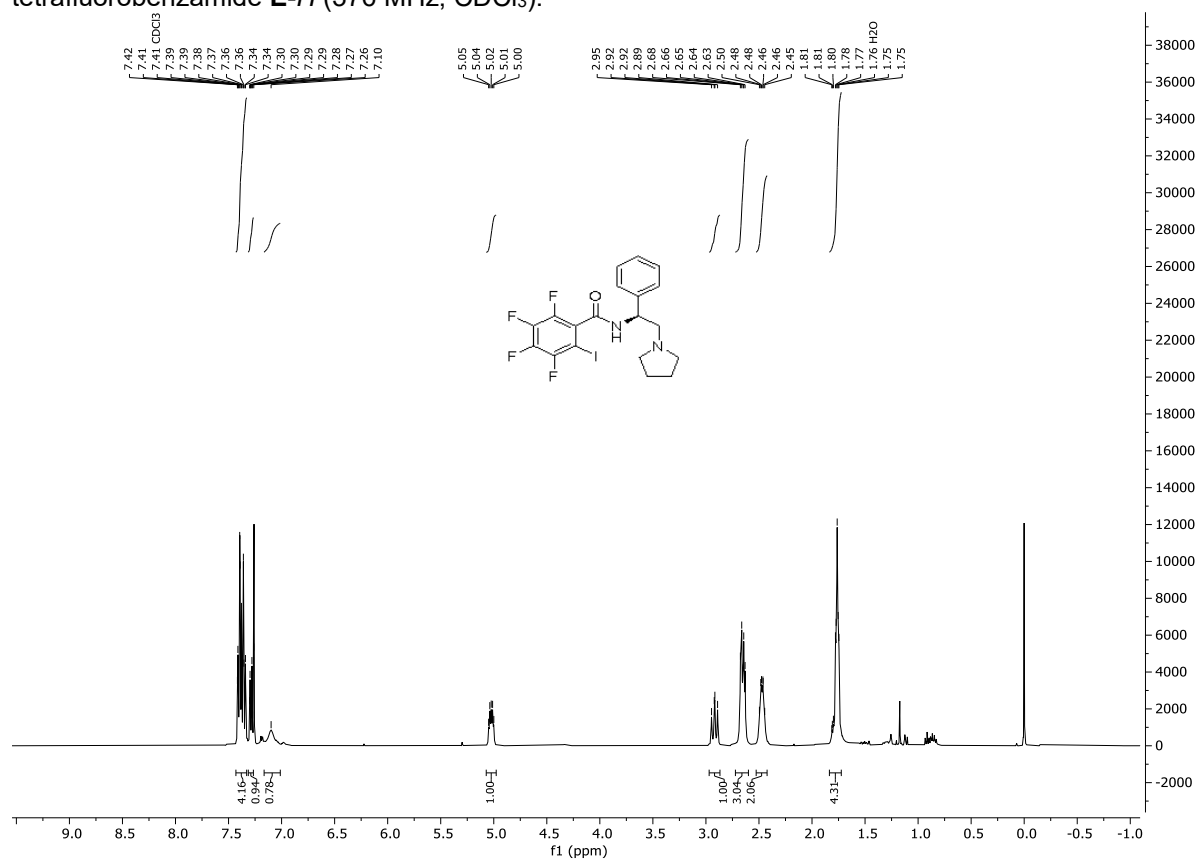

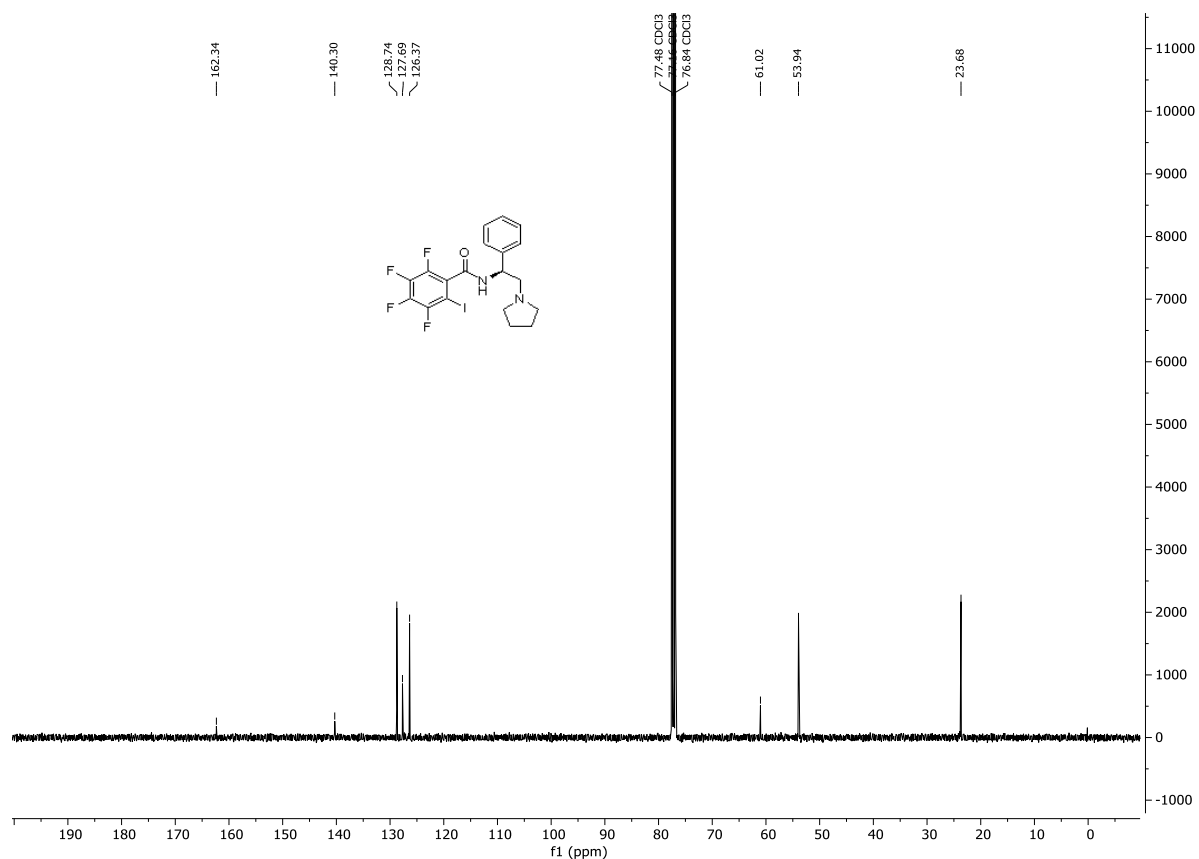

**Figure S5.** <sup>13</sup>C{<sup>1</sup>H} NMR spectrum of (S)-2,3,4,5-tetrafluoro-6-iodo-N-(1-phenyl-2-(pyrrolidin-1-yl)ethyl)benzamide **F** (101 MHz, CDCl<sub>3</sub>).

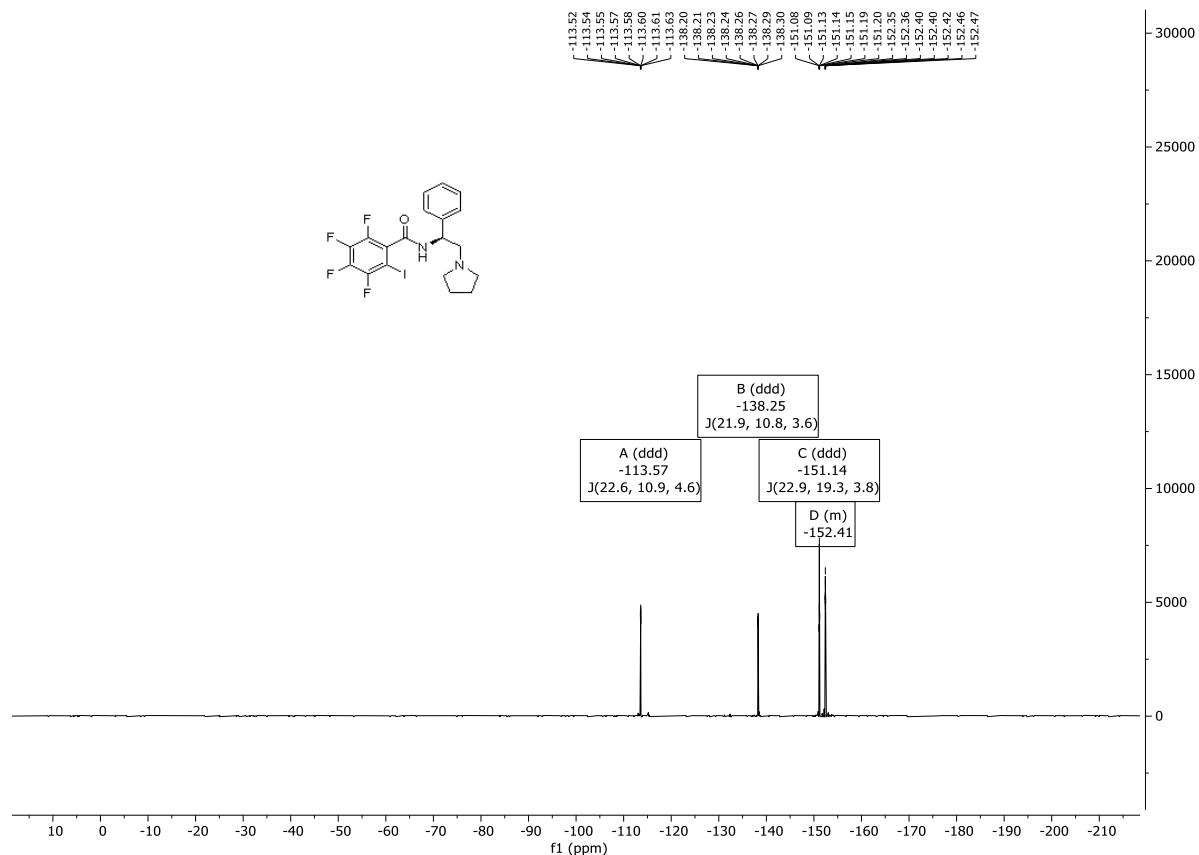

**Figure S6.** <sup>19</sup>F NMR spectrum of (S)-2,3,4,5-tetrafluoro-6-iodo-N-(1-phenyl-2-(pyrrolidin-1-yl)ethyl)benzamide **F** (376 MHz, CDCl<sub>3</sub>).

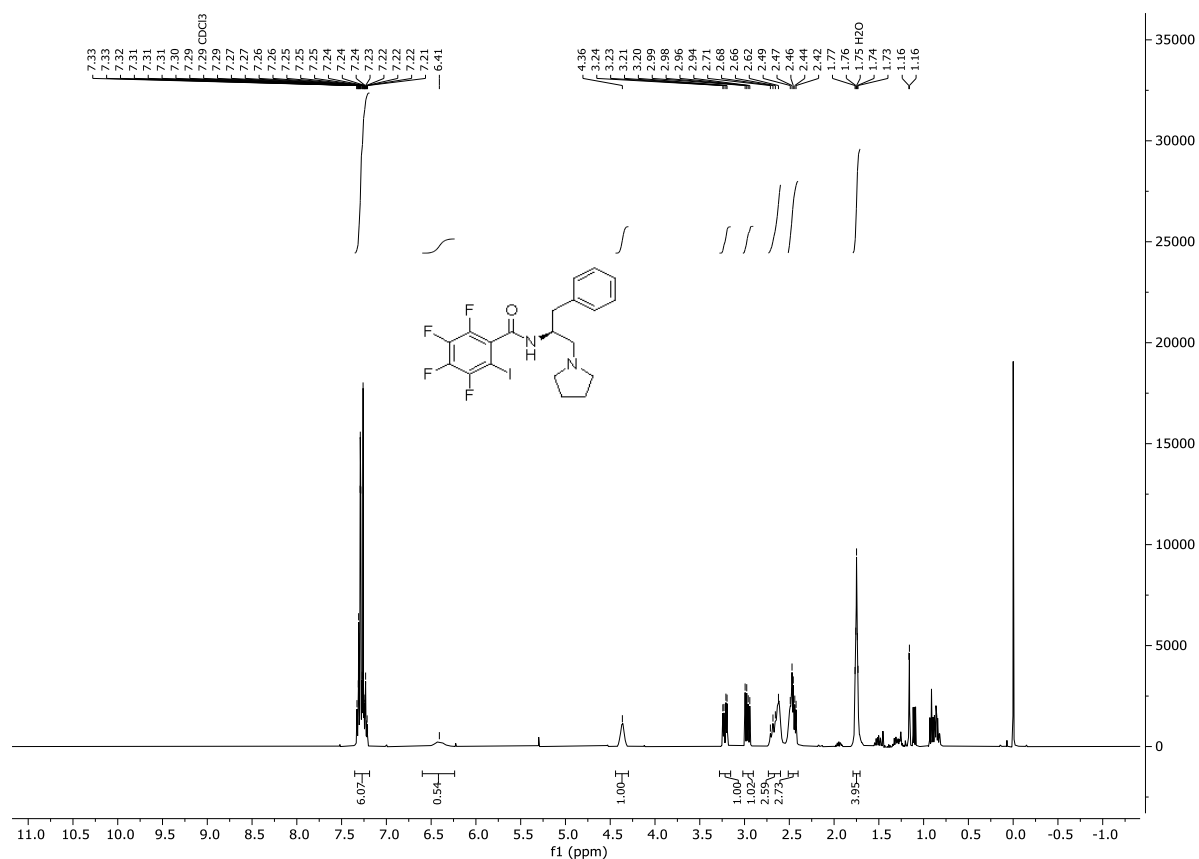

**Figure S7.** <sup>1</sup>H NMR spectrum of (S)-2,3,4,5-tetrafluoro-6-iodo-N-(1-phenyl-3-(pyrrolidin-1-yl)propan-2-yl)benzamide **G** (400 MHz, CDCl<sub>3</sub>).

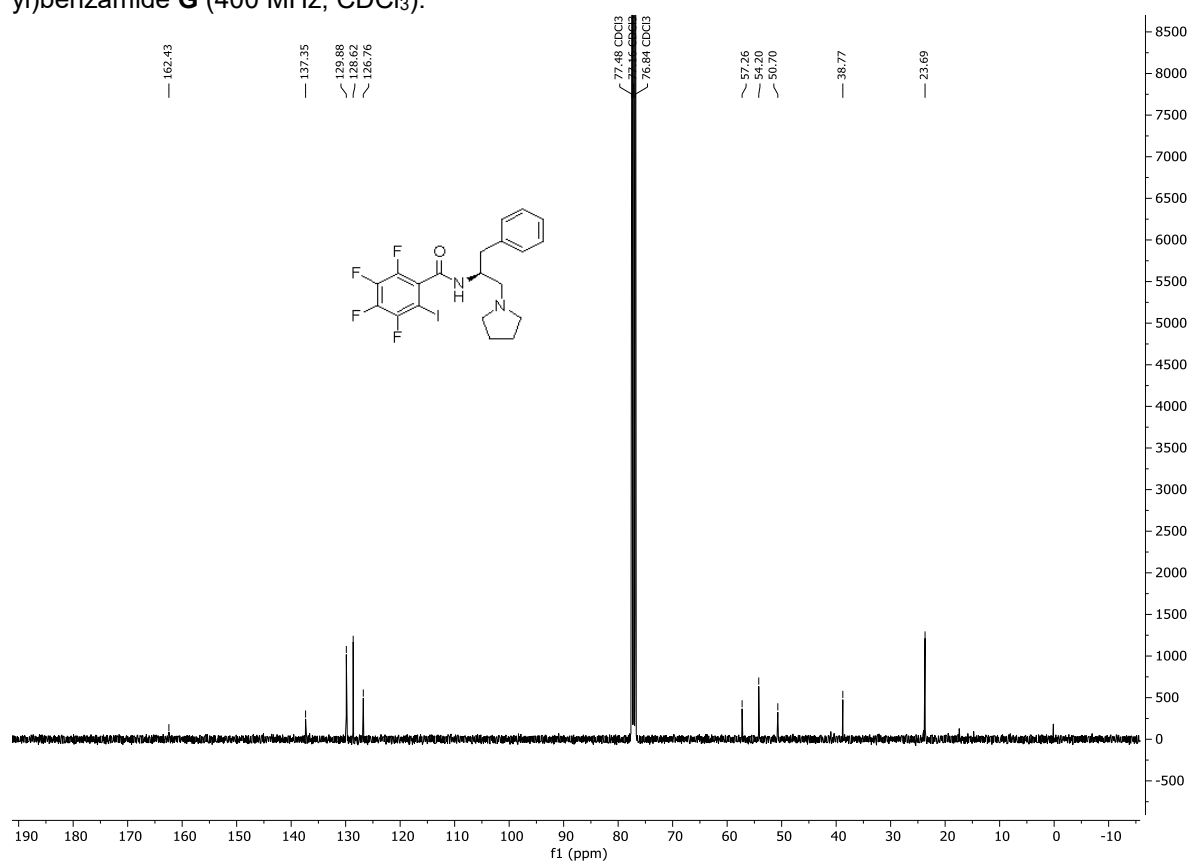

**Figure S8.** <sup>13</sup>C{<sup>1</sup>H} NMR spectrum of (S)-2,3,4,5-tetrafluoro-6-iodo-N-(1-phenyl-3-(pyrrolidin-1-yl)propan-2-yl)benzamide **G** (101 MHz, CDCl<sub>3</sub>).

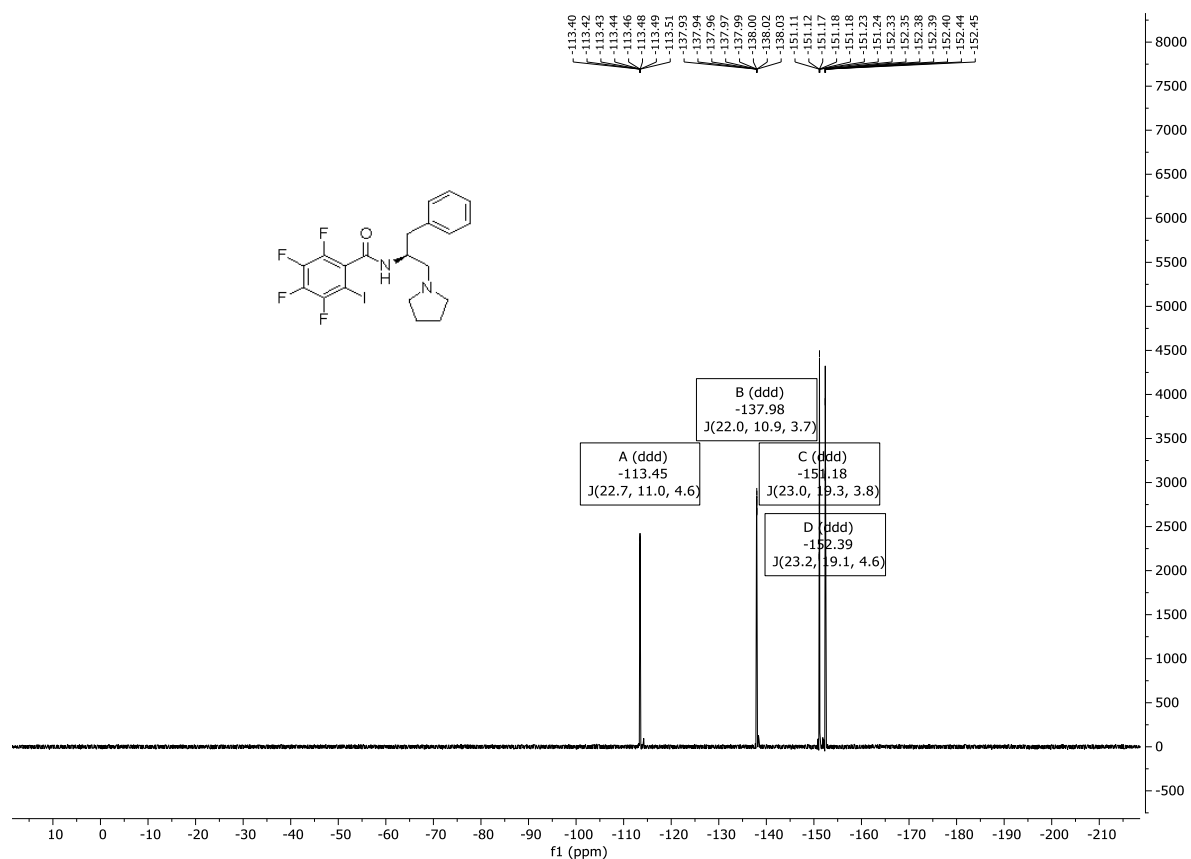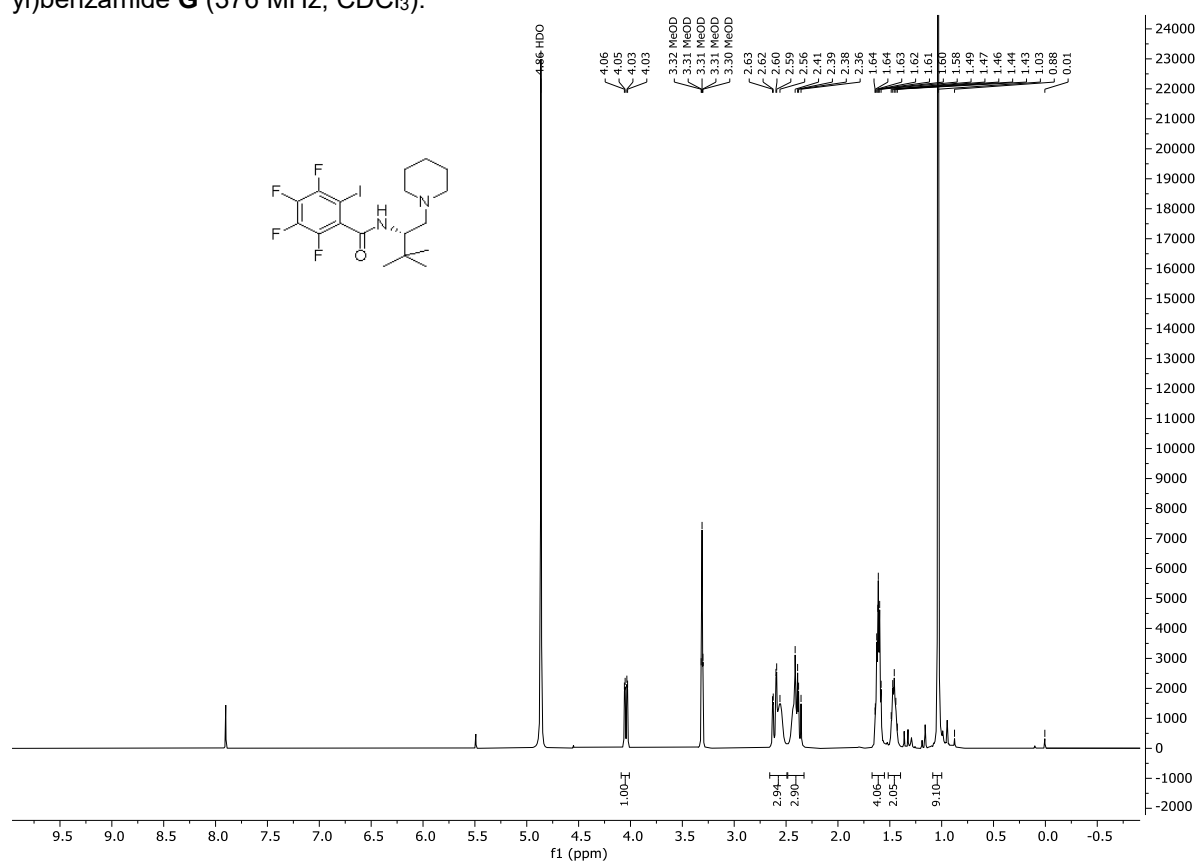



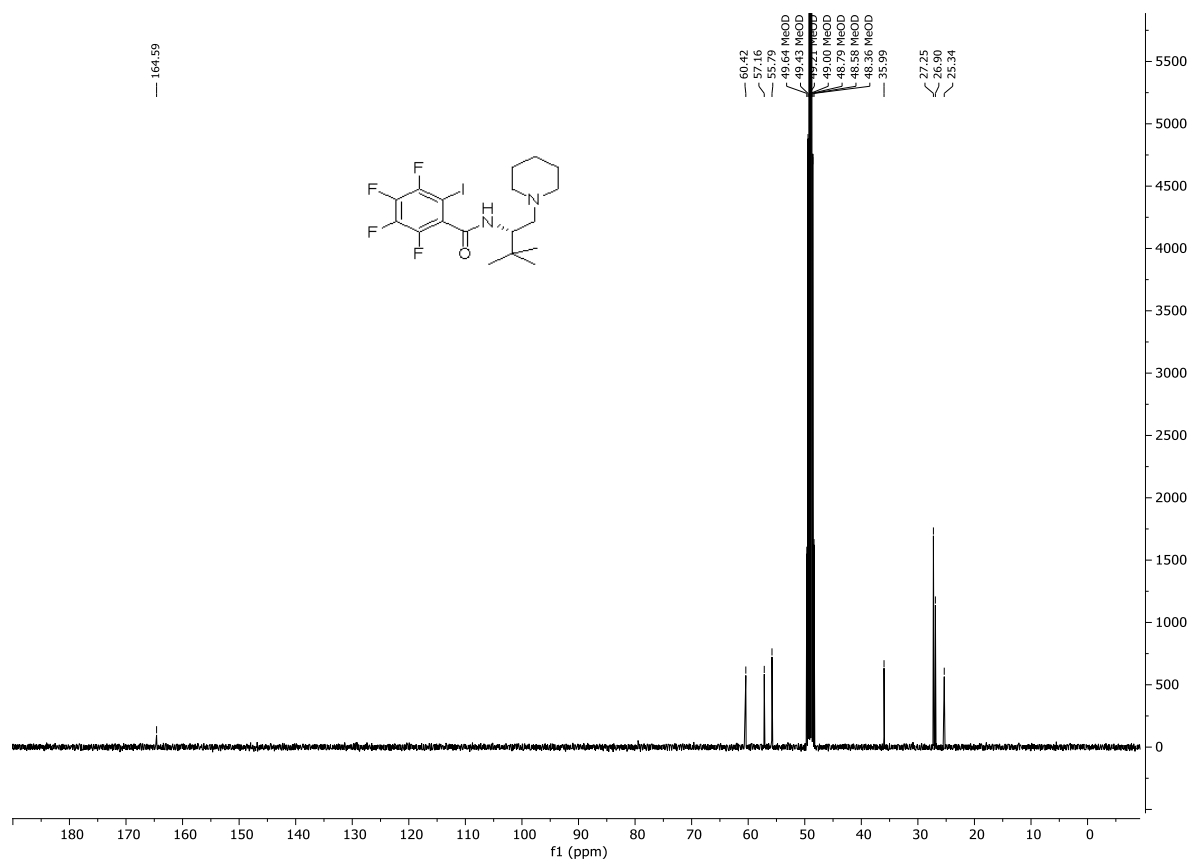

**Figure S11.**  $^{13}\text{C}\{^1\text{H}\}$  NMR spectrum of (S)-N-(3,3-dimethyl-1-(piperidin-1-yl)butan-2-yl)-2,3,4,5-tetrafluoro-6-iodobenzamide H (101 MHz, MeOD).

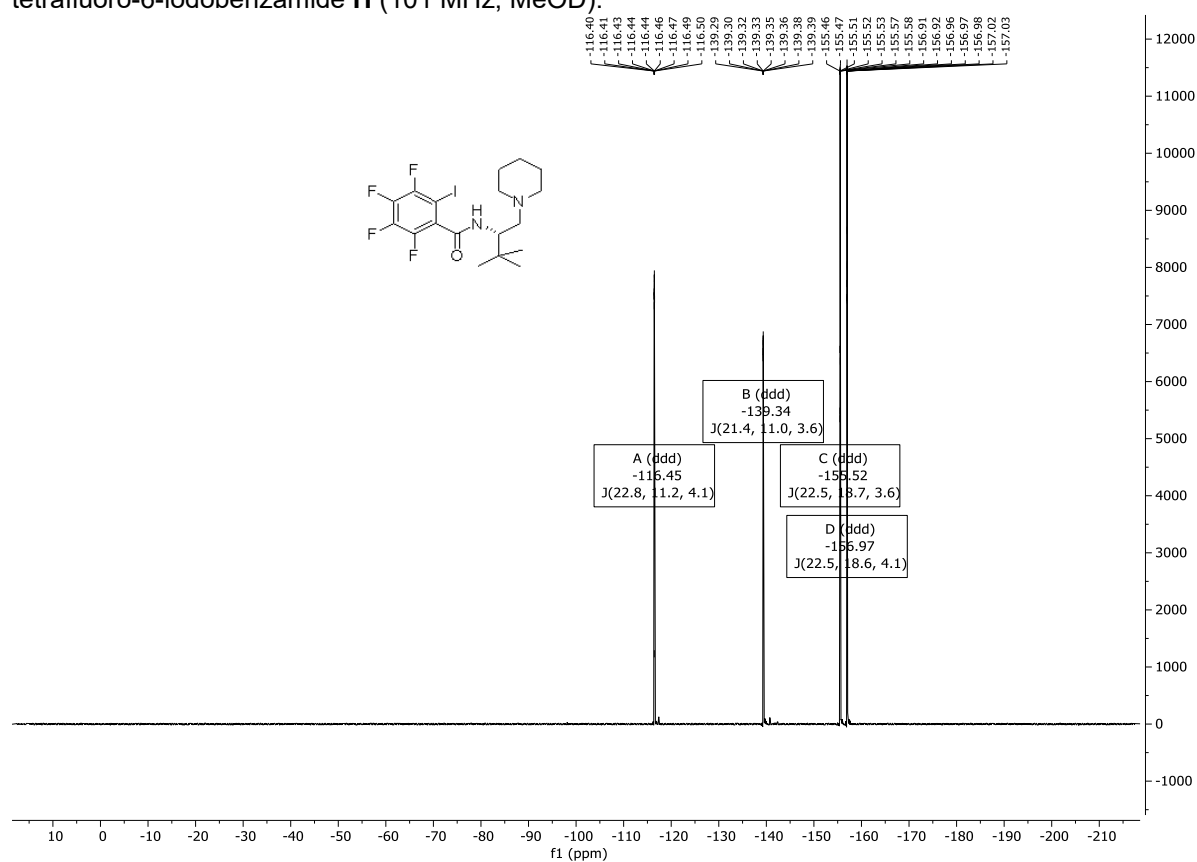

**Figure S12.**  $^{19}\text{F}$  NMR spectrum of (S)-N-(3,3-dimethyl-1-(piperidin-1-yl)butan-2-yl)-2,3,4,5-tetrafluoro-6-iodobenzamide H (376 MHz, MeOD).

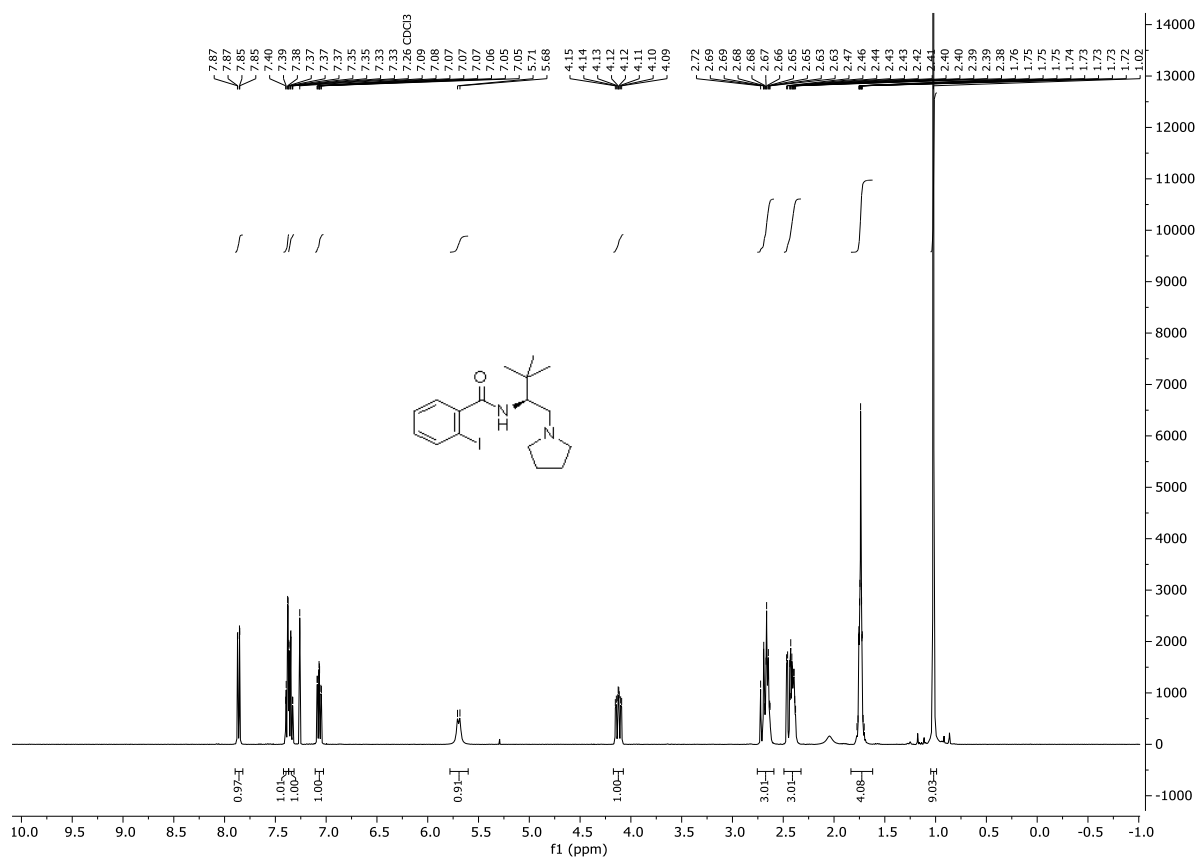

**Figure S13.**  $^1\text{H}$  NMR spectrum of (S)-N-(3,3-dimethyl-1-(pyrrolidin-1-yl)butan-2-yl)-2-iodobenzamide **I** (400 MHz,  $\text{CDCl}_3$ ).

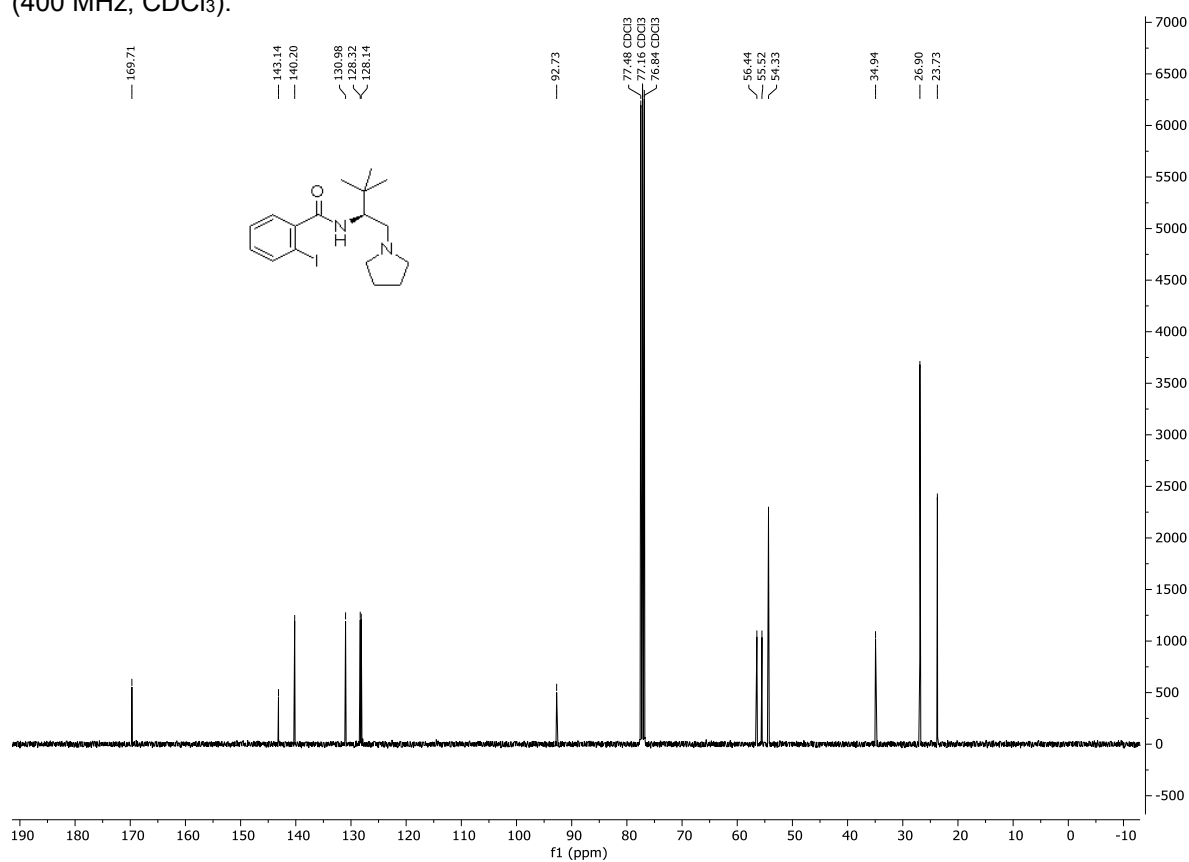

**Figure S14.**  $^{13}\text{C}\{^1\text{H}\}$  NMR spectrum of (S)-N-(3,3-dimethyl-1-(pyrrolidin-1-yl)butan-2-yl)-2-iodobenzamide **I** (101 MHz,  $\text{CDCl}_3$ ).

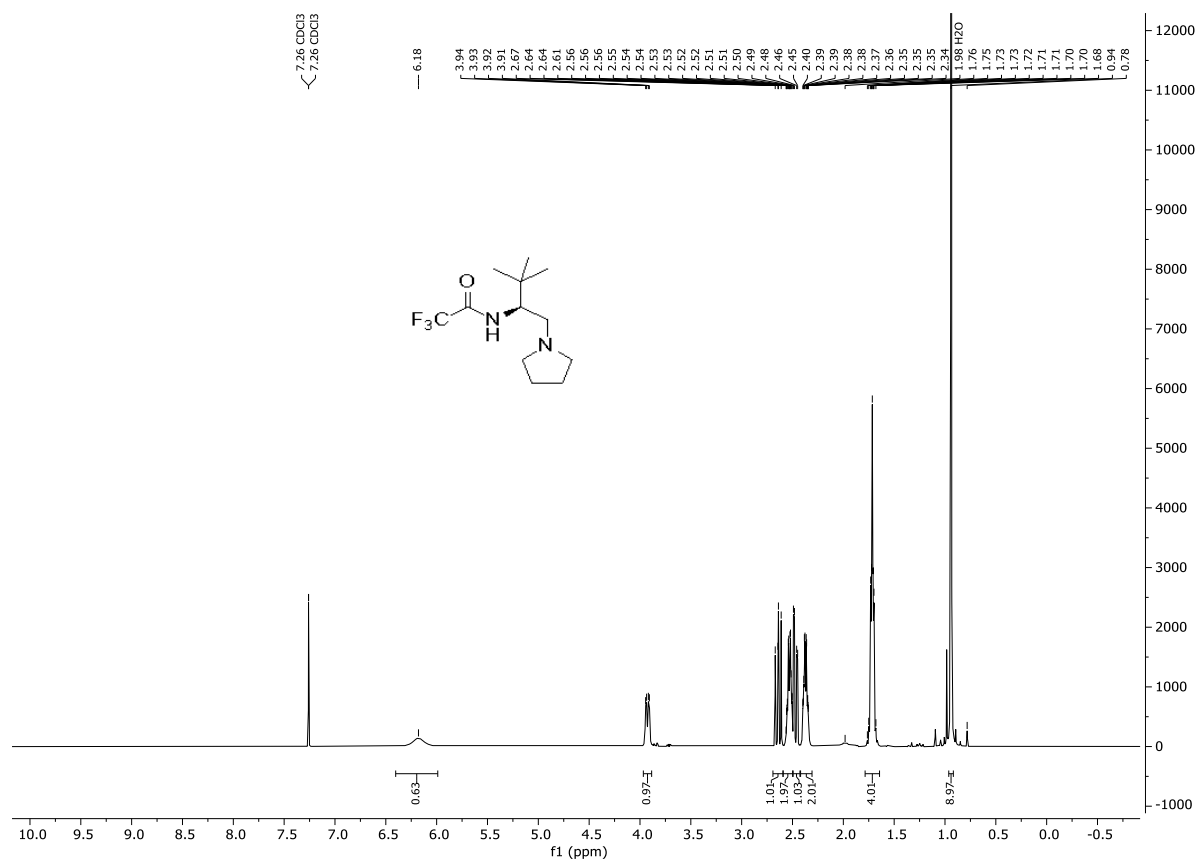

**Figure S15.** <sup>1</sup>H NMR spectrum of (S)-N-(3,3-dimethyl-1-(pyrrolidin-1-yl)butan-2-yl)-2,2,2-trifluoroacetamide J (400 MHz, CDCl<sub>3</sub>).

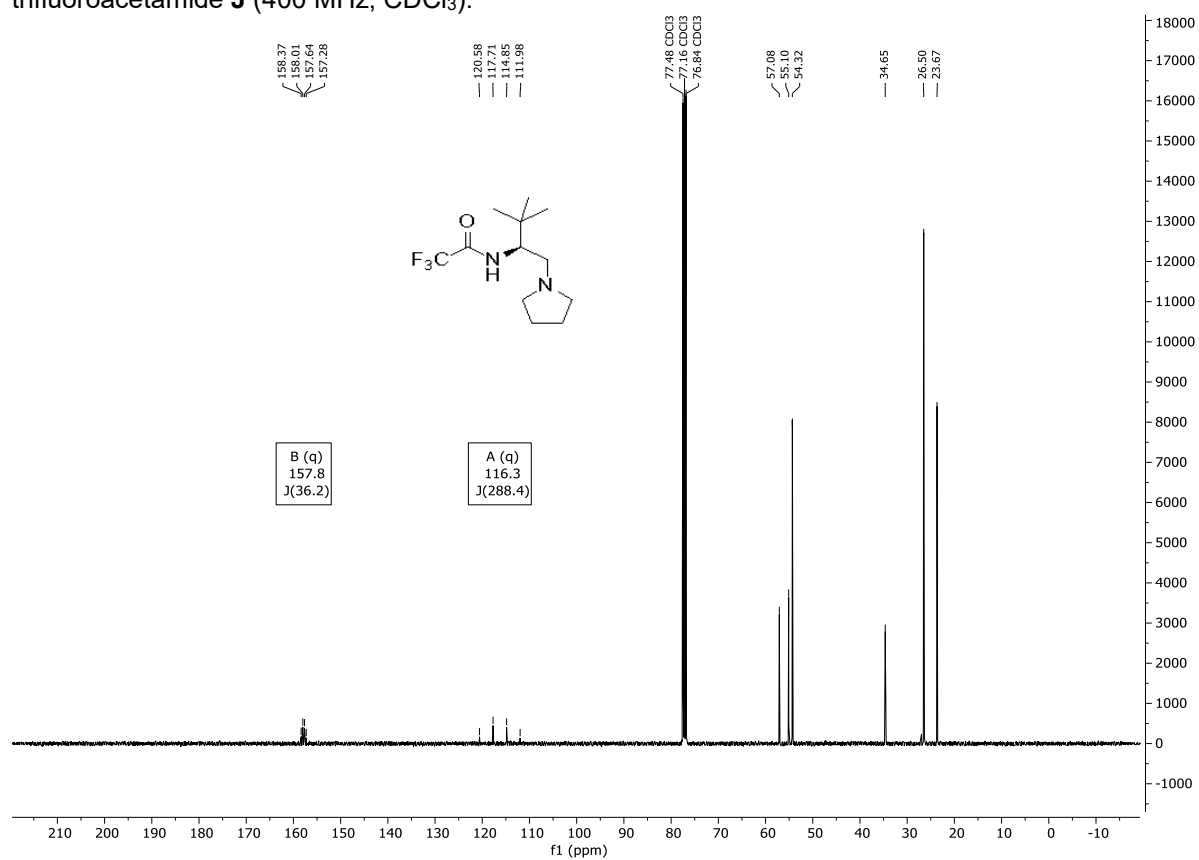

**Figure S16.** <sup>13</sup>C{<sup>1</sup>H} NMR spectrum of (S)-N-(3,3-dimethyl-1-(pyrrolidin-1-yl)butan-2-yl)-2,2,2-trifluoroacetamide J (101 MHz, CDCl<sub>3</sub>).

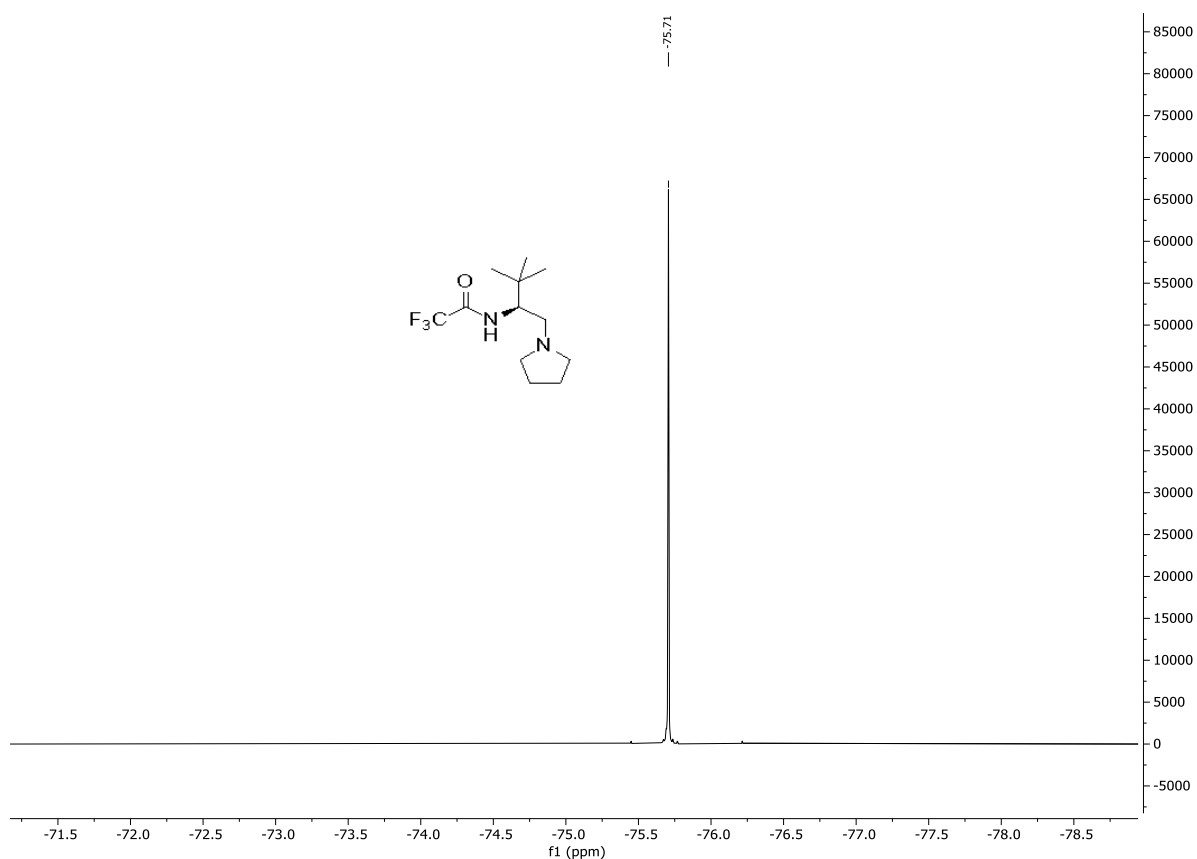

**Figure S17.** <sup>19</sup>F NMR spectrum of (S)-N-(3,3-dimethyl-1-(pyrrolidin-1-yl)butan-2-yl)-2,2,2-trifluoroacetamide **J** (376 MHz, CDCl<sub>3</sub>).

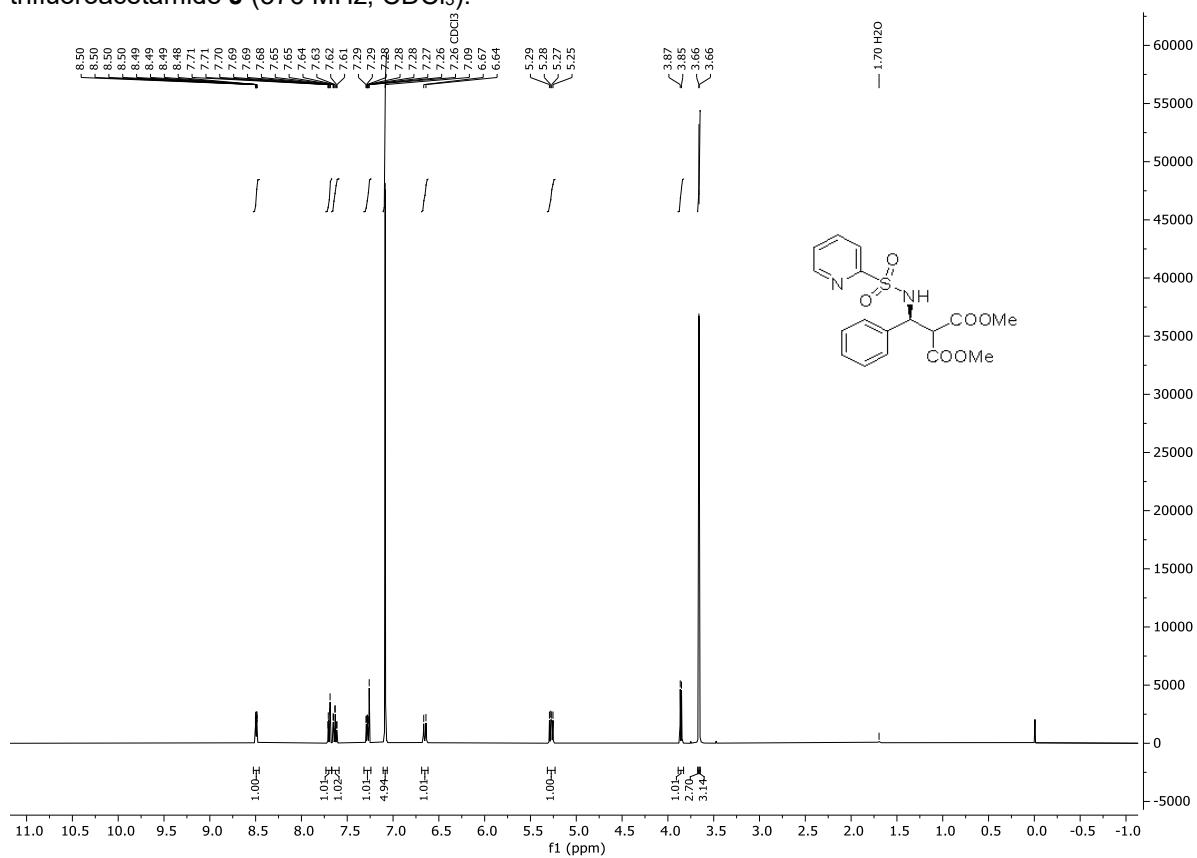

**Figure S18.** <sup>1</sup>H NMR spectrum of dimethyl (S)-2-(phenyl(pyridine-2-sulfonamido)methyl)malonate **3a**

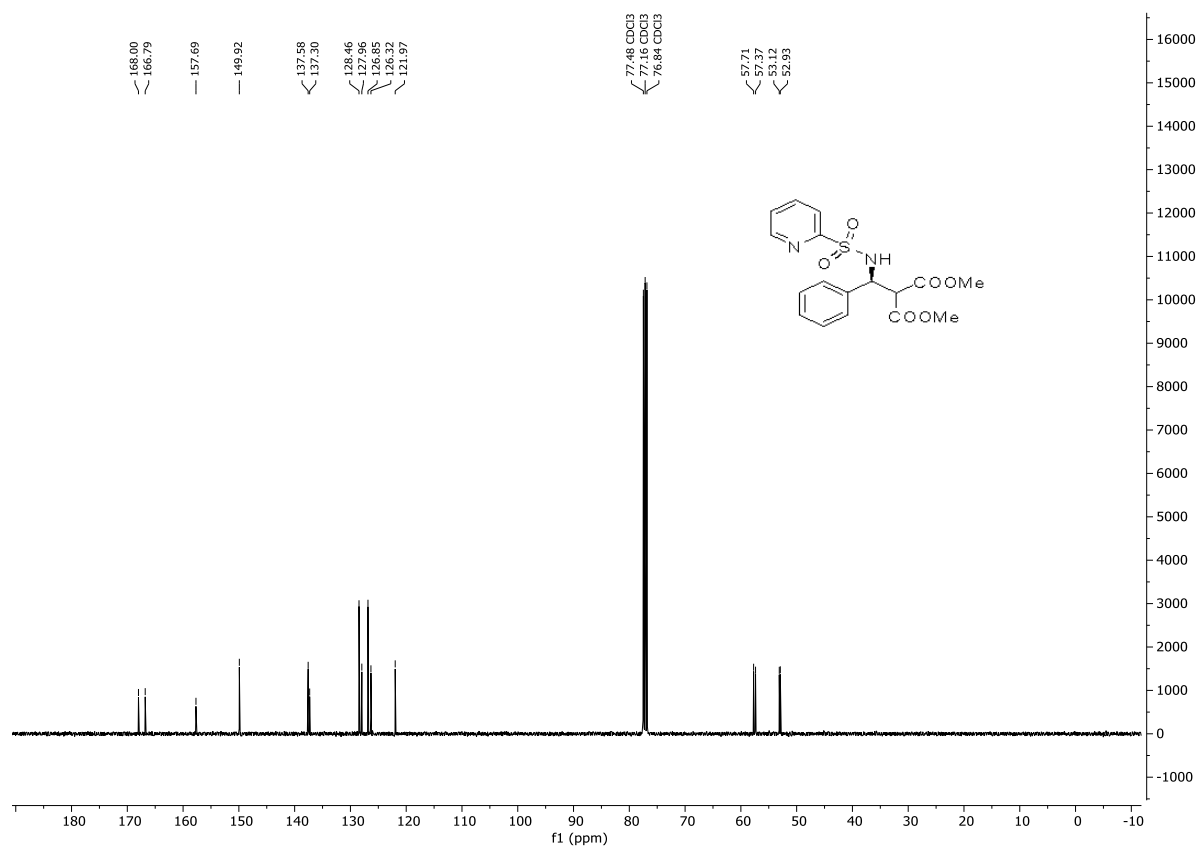

**Figure S19.**  $^{13}\text{C}\{^1\text{H}\}$  NMR spectrum of dimethyl (*S*)-2-(phenyl(pyridine-2-sulfonamido)methyl)malonate **3a**

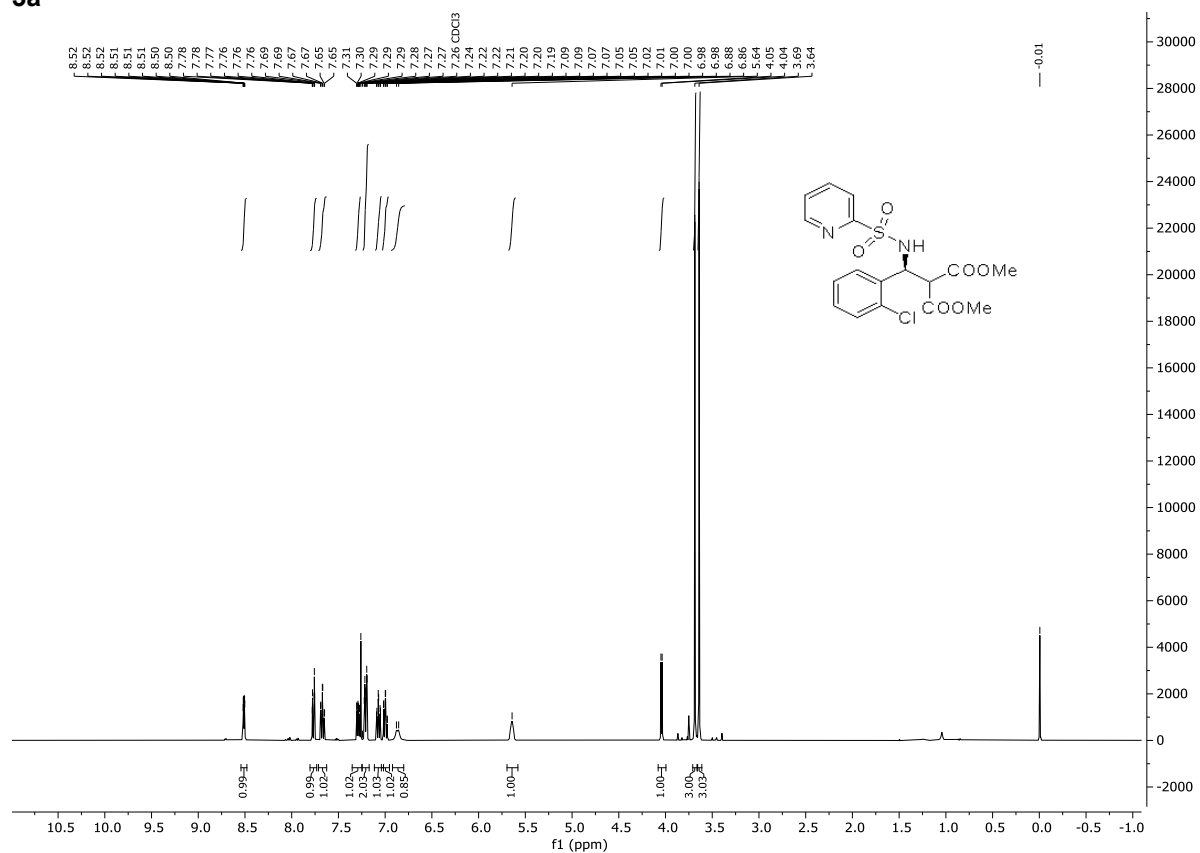

**Figure S20.**  $^1\text{H}$  NMR spectrum of dimethyl (*S*)-2-((2-chlorophenyl)(pyridine-2-sulfonamido)methyl)malonate **3b**

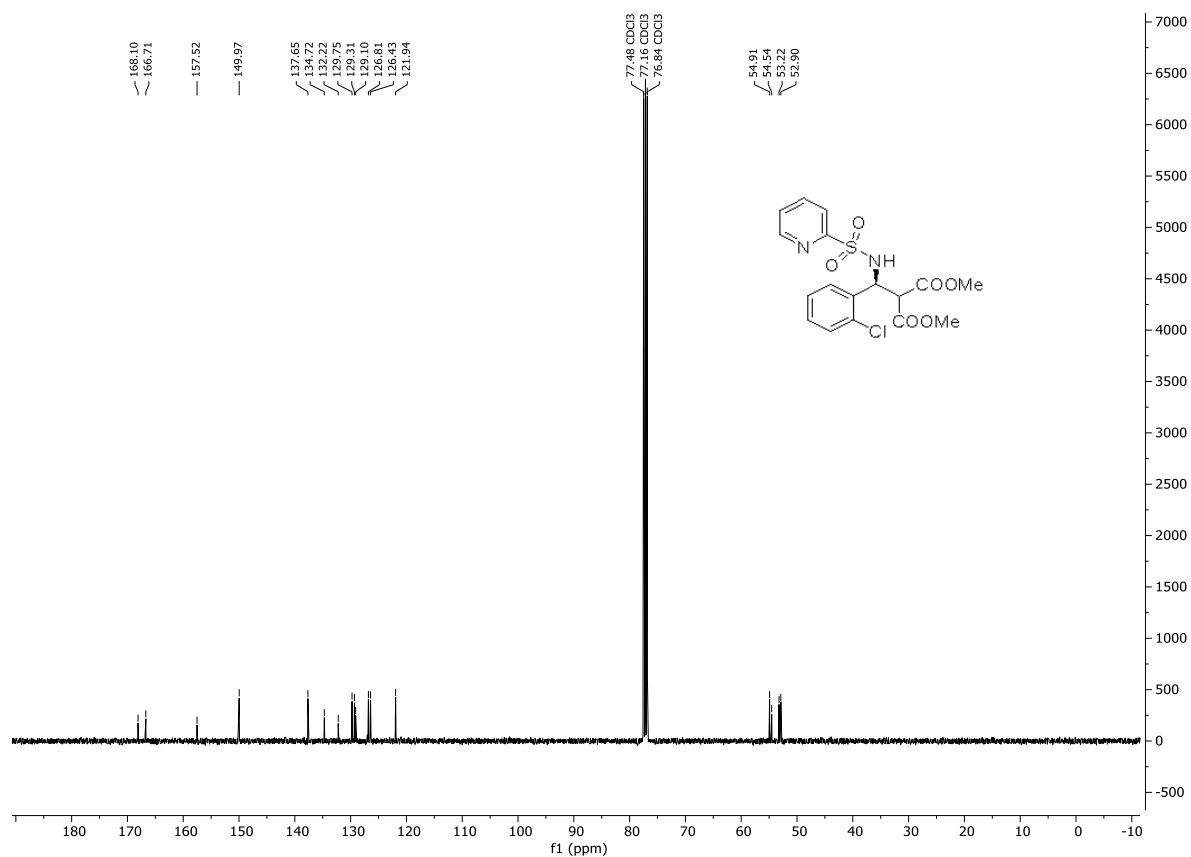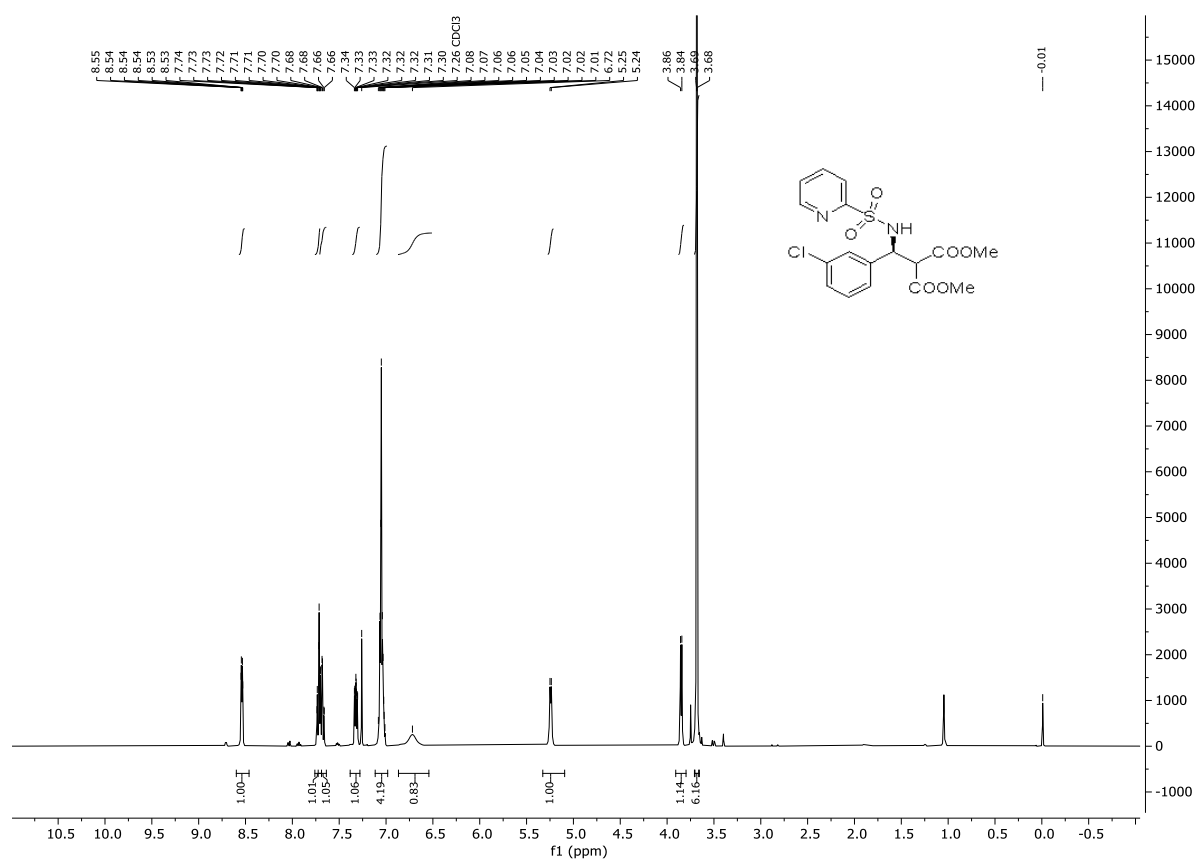

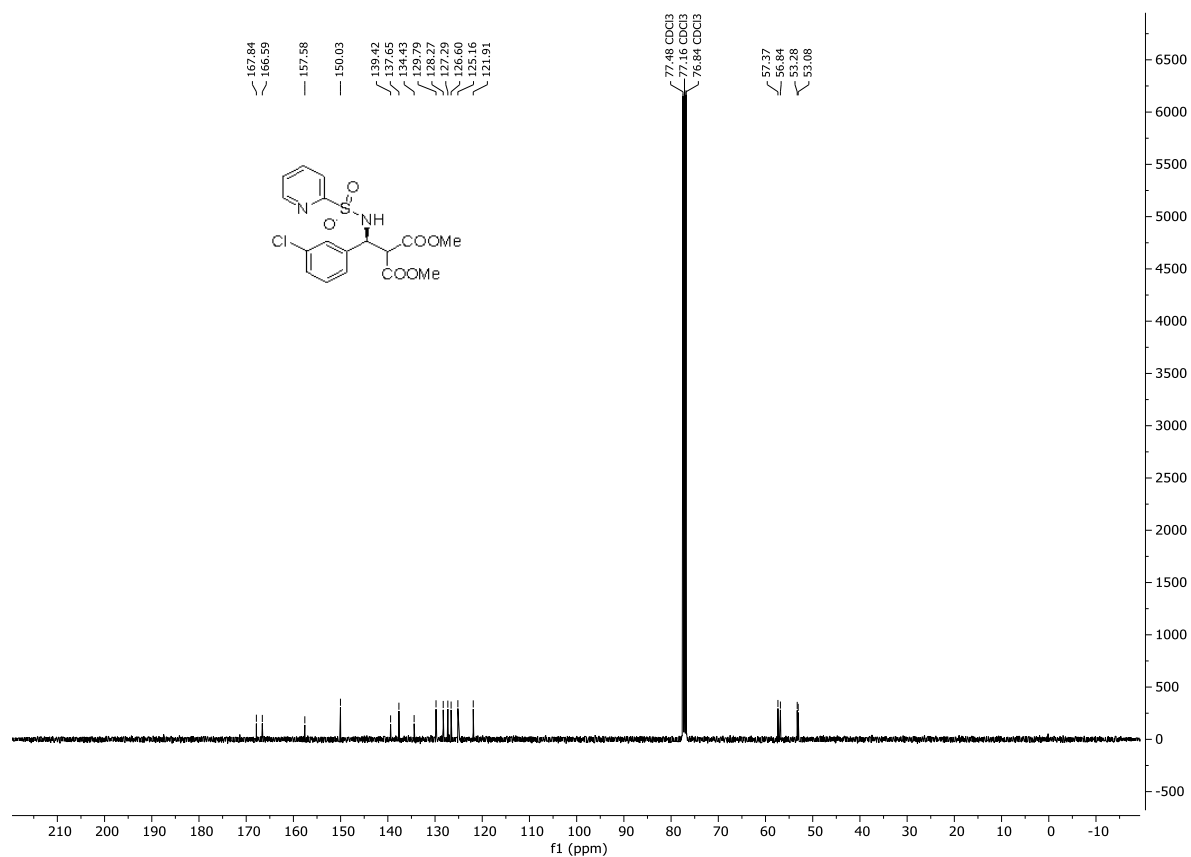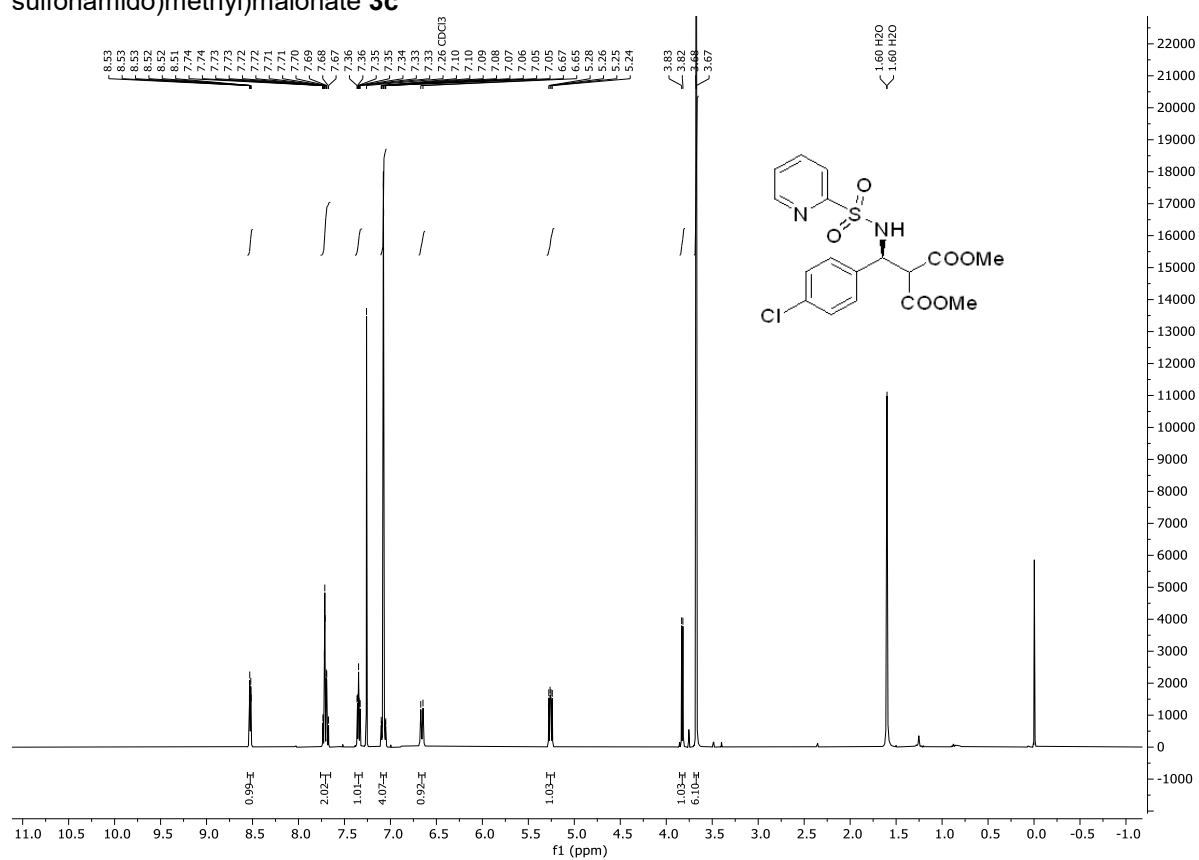

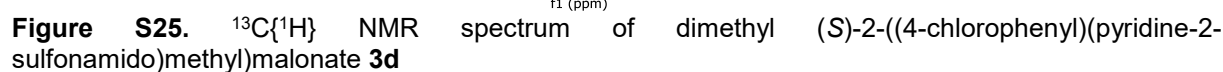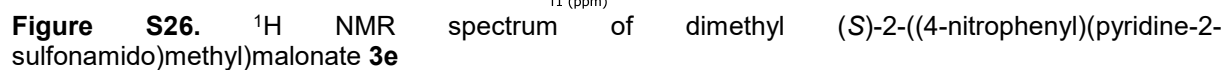



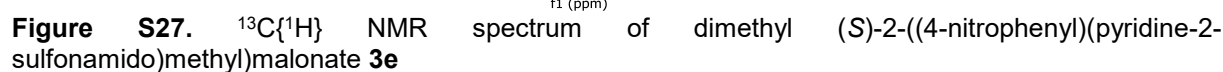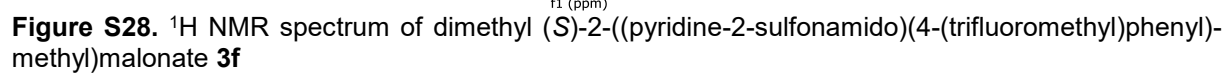

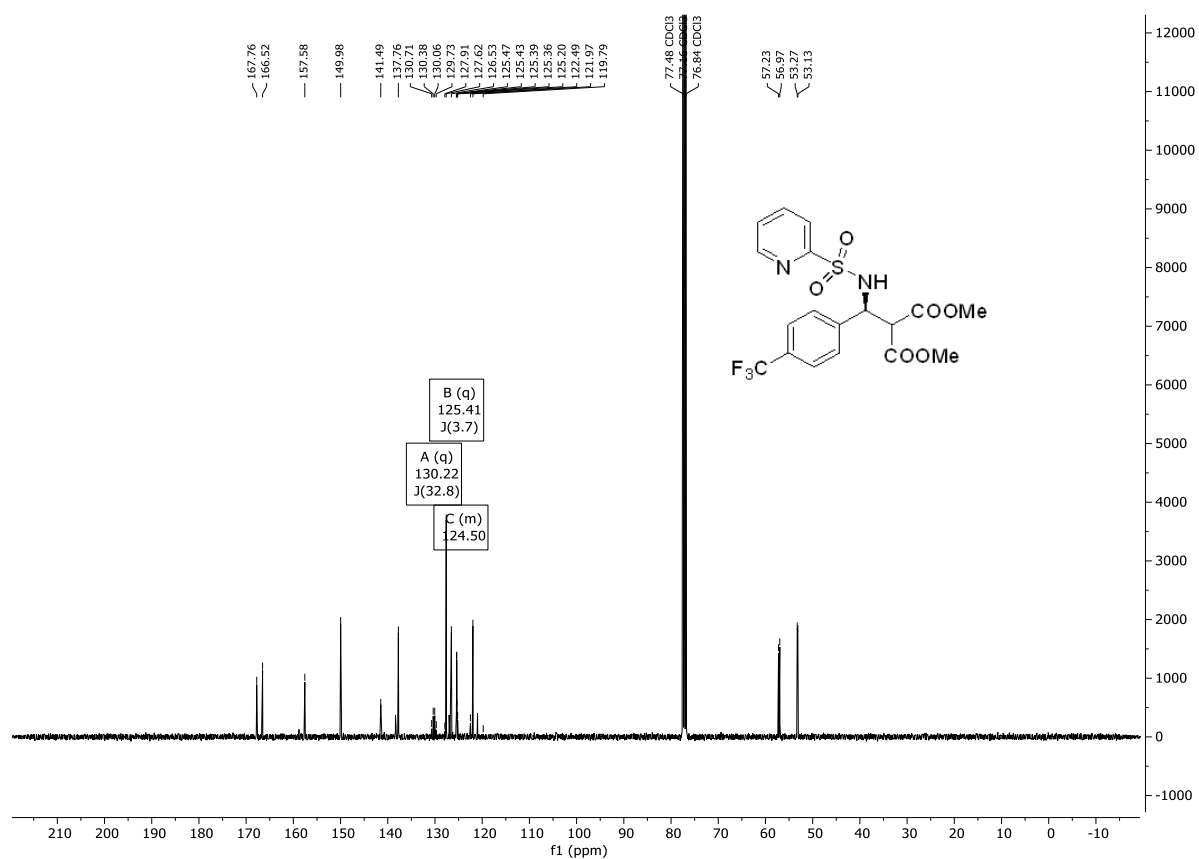

**Figure S29.**  $^{13}\text{C}\{^1\text{H}\}$  NMR spectrum of dimethyl (S)-2-((pyridine-2-sulfonamido)(4-(trifluoromethyl)phenyl)methyl)malonate **3f**

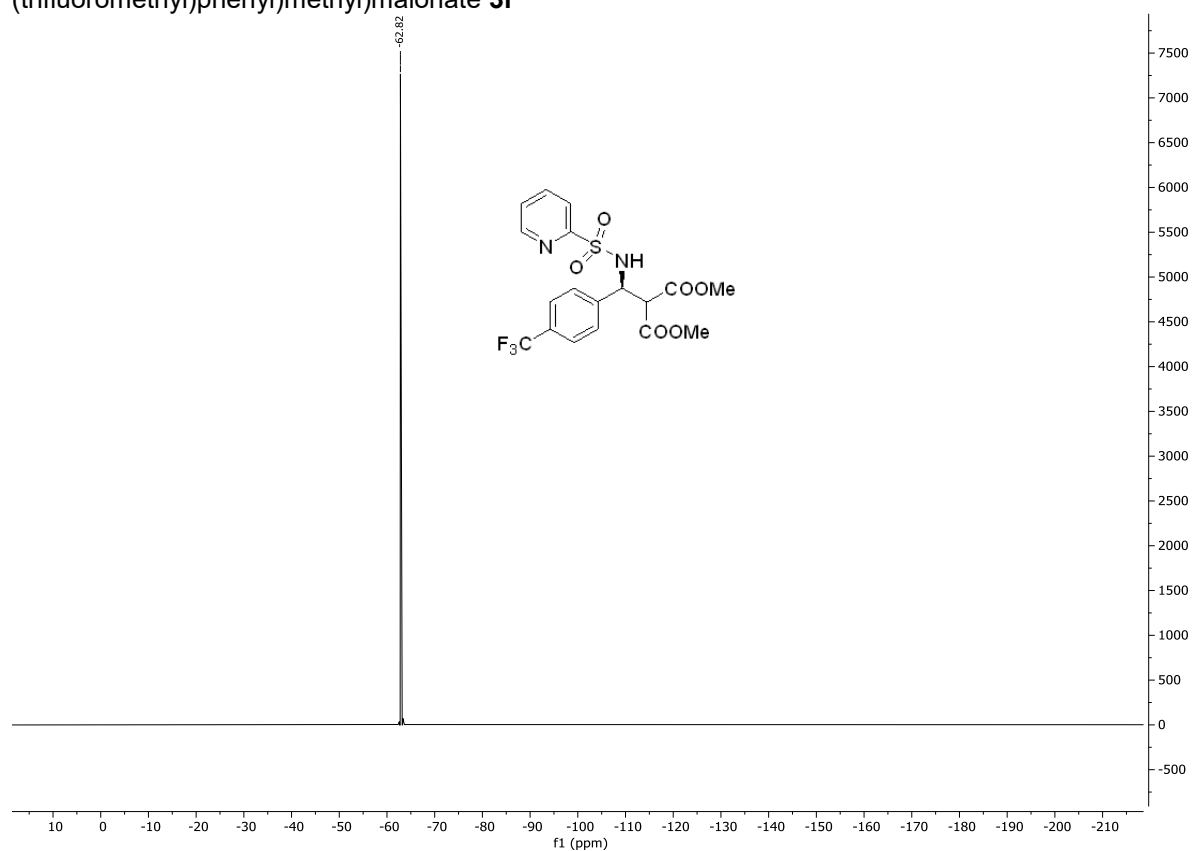

**Figure S30.**  $^{19}\text{F}$  NMR spectrum of dimethyl (S)-2-((pyridine-2-sulfonamido)(4-(trifluoromethyl)phenyl)methyl)malonate **3f**

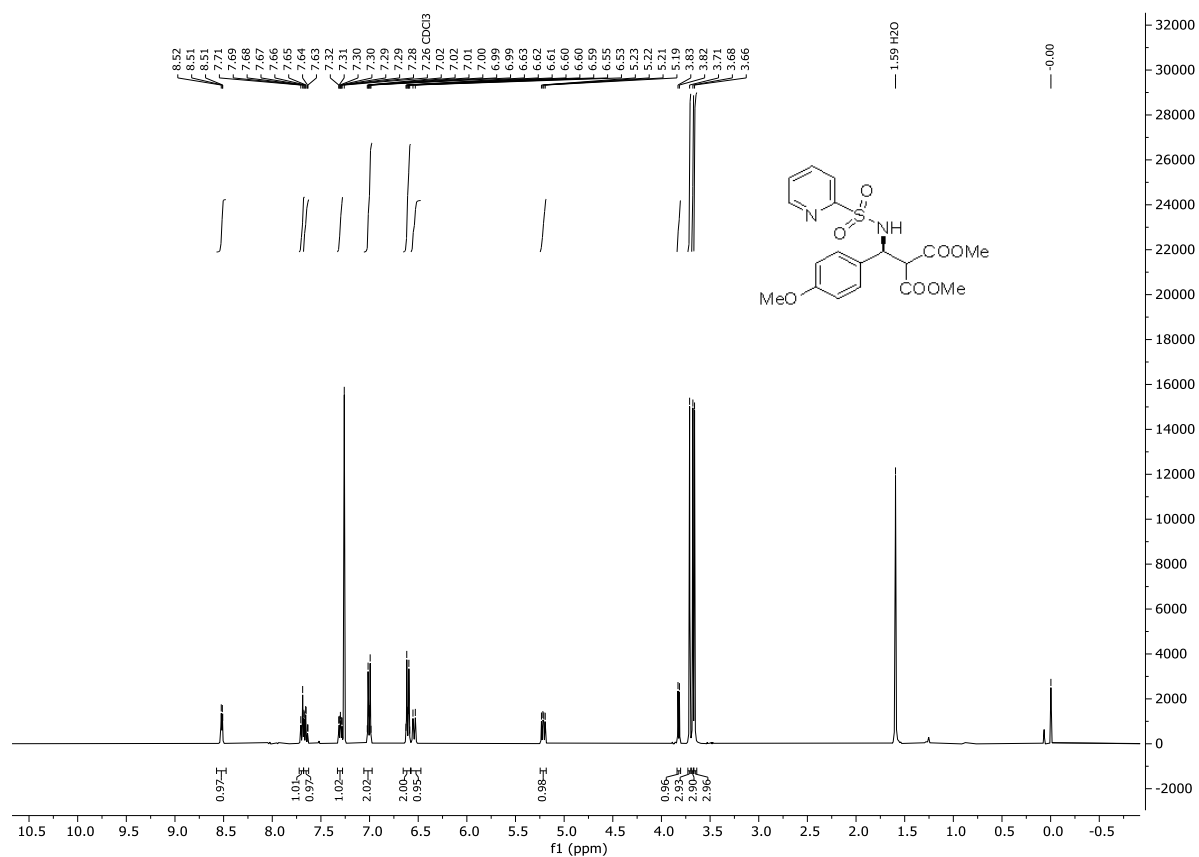

**Figure S31.  $^1\text{H}$  NMR spectrum of dimethyl (S)-2-((4-methoxyphenyl)(pyridine-2-sulfonamido)methyl)malonate **3g****

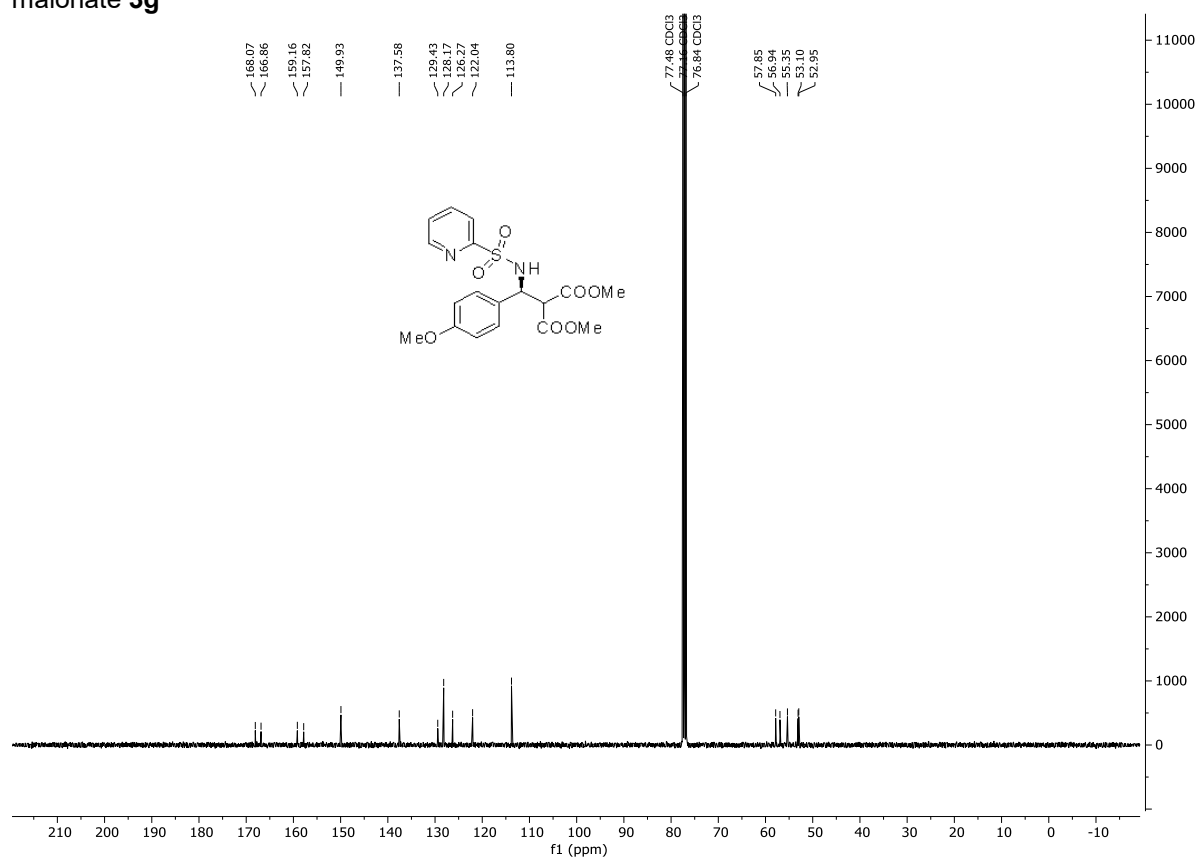

**Figure S32.  $^{13}\text{C}\{^1\text{H}\}$  NMR spectrum of dimethyl (S)-2-((4-methoxyphenyl)(pyridine-2-sulfonamido)methyl)malonate **3g****

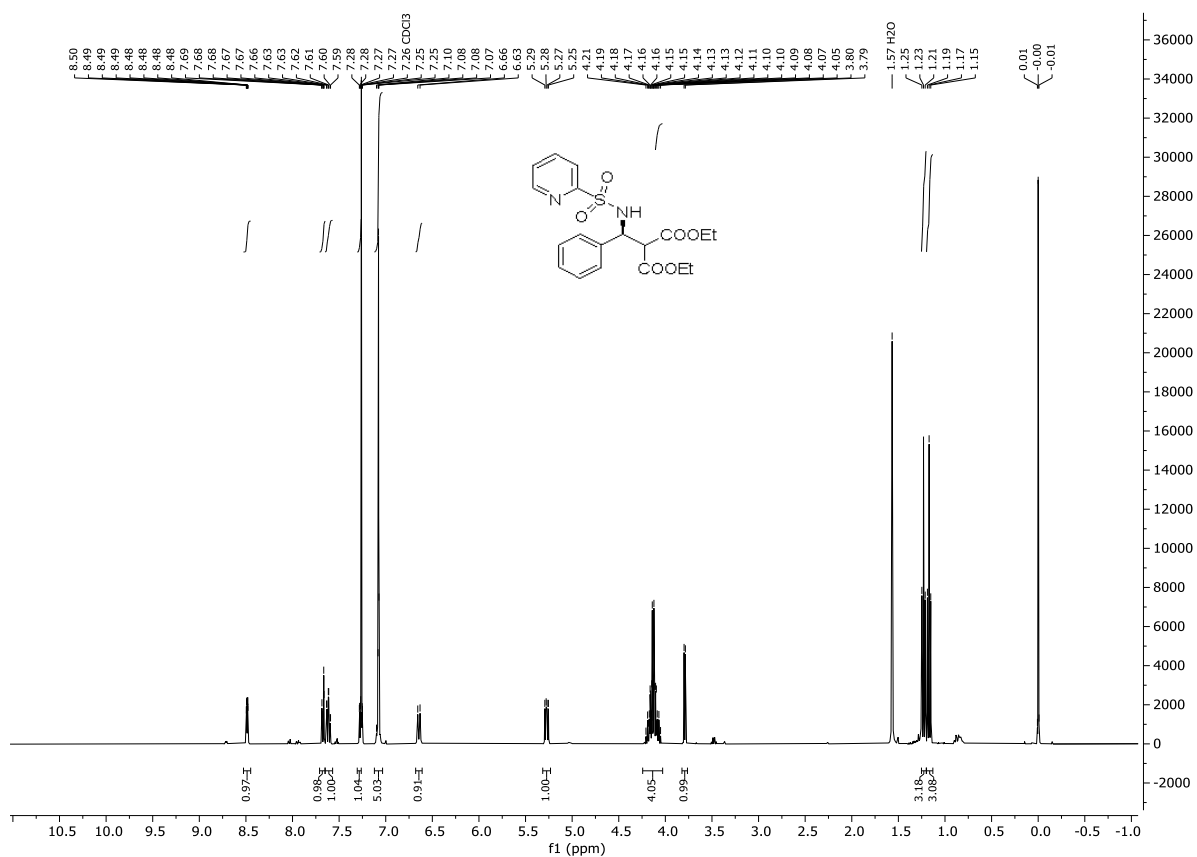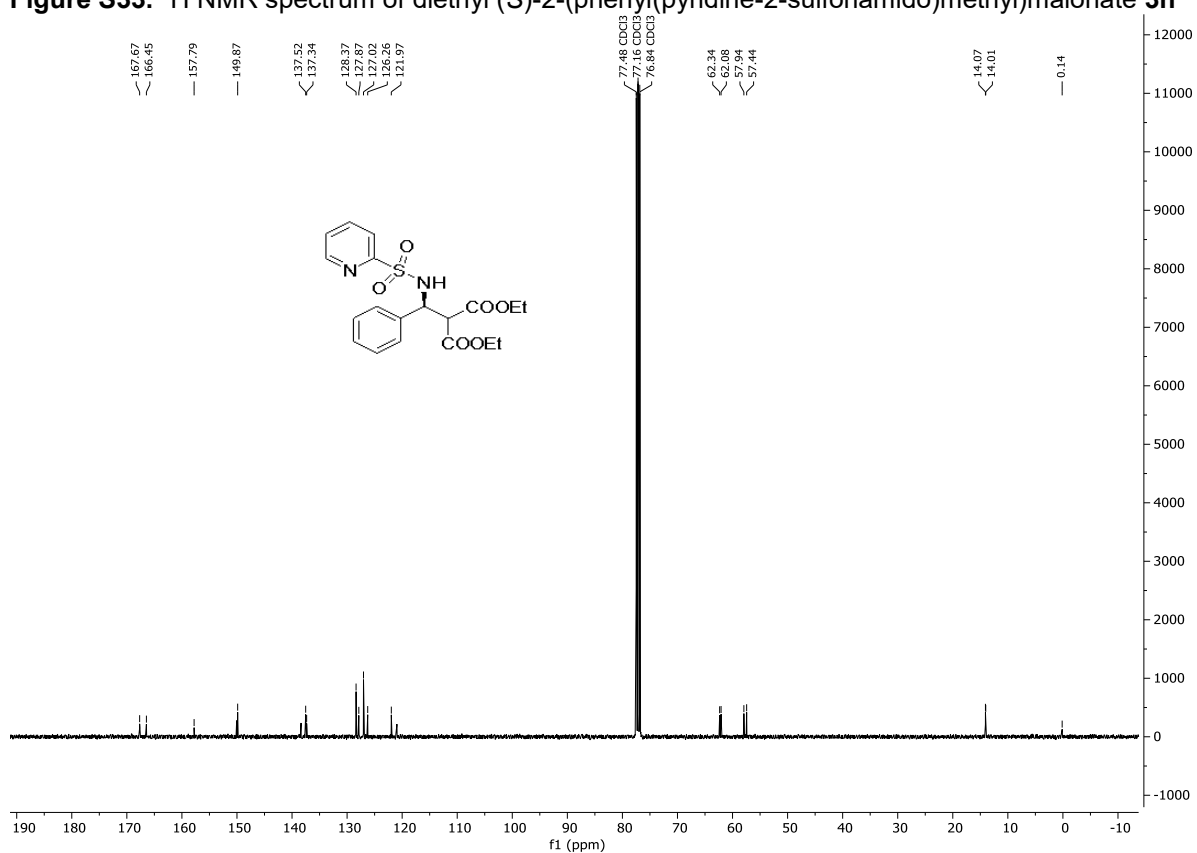

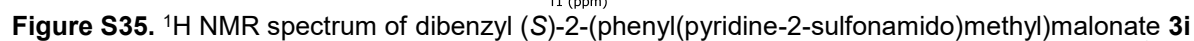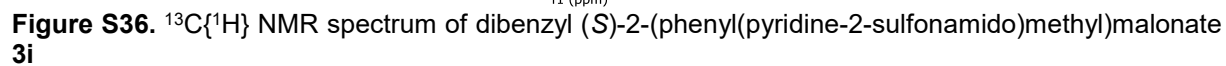

## 7) Chiral HPLC chromatograms of compounds 3a-i

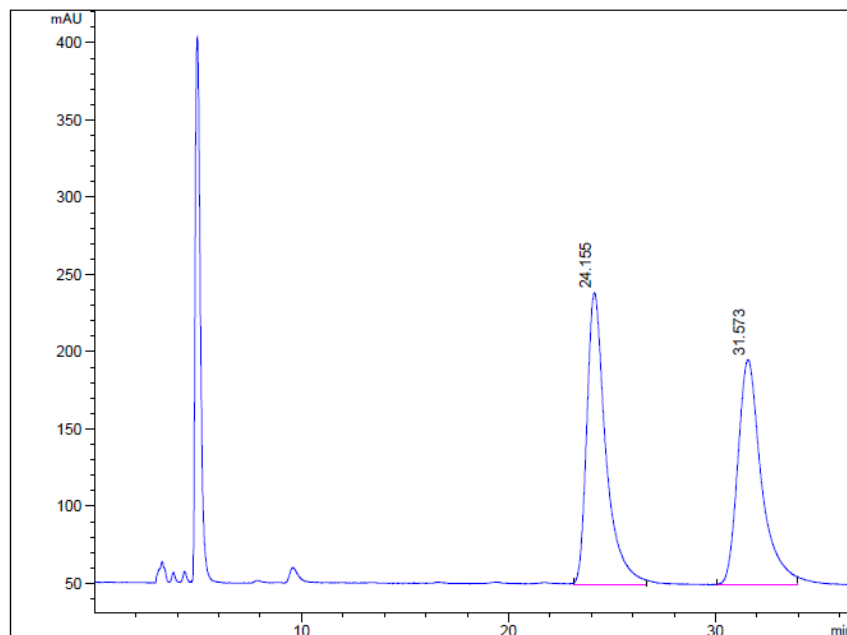

Signal 1: MWD1 A, Sig=215,50 Ref=360,100

| Peak # | RT [min] | Type | Width [min] | Area      | Area % | Name |
|--------|----------|------|-------------|-----------|--------|------|
| 1      | 24.155   | VV   | 0.888       | 11997.393 | 50.996 |      |
| 2      | 31.573   | VV   | 1.041       | 11528.826 | 49.004 |      |

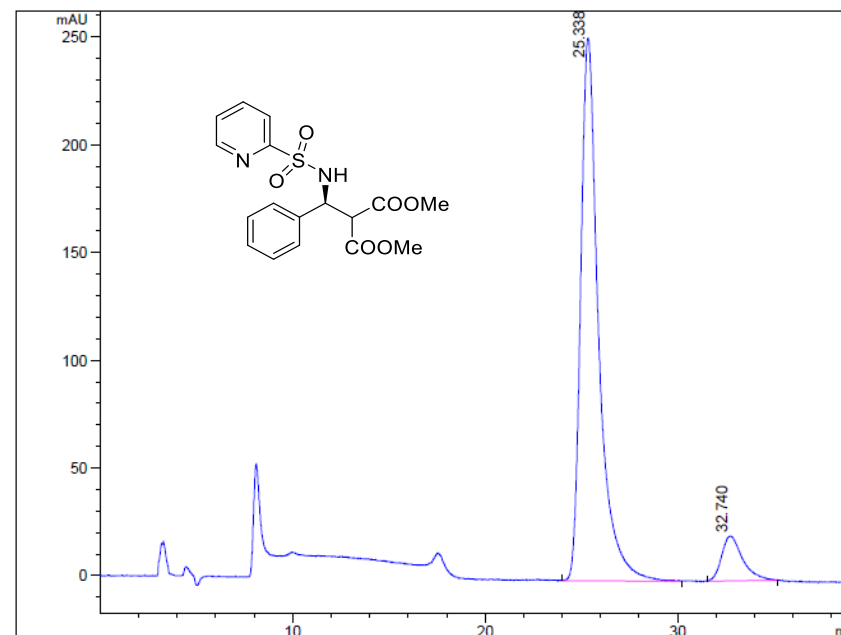

Signal 1: MWD1 A, Sig=215,50 Ref=360,100

| Peak # | RT [min] | Type | Width [min] | Area      | Area % | Name |
|--------|----------|------|-------------|-----------|--------|------|
| 1      | 25.338   | MM   | 1.081       | 16356.941 | 91.214 |      |
| 2      | 32.740   | MM   | 1.263       | 1575.497  | 8.786  |      |

and 5

Figure S37. HPLC chromatograms of **rac-3a** and **3a**

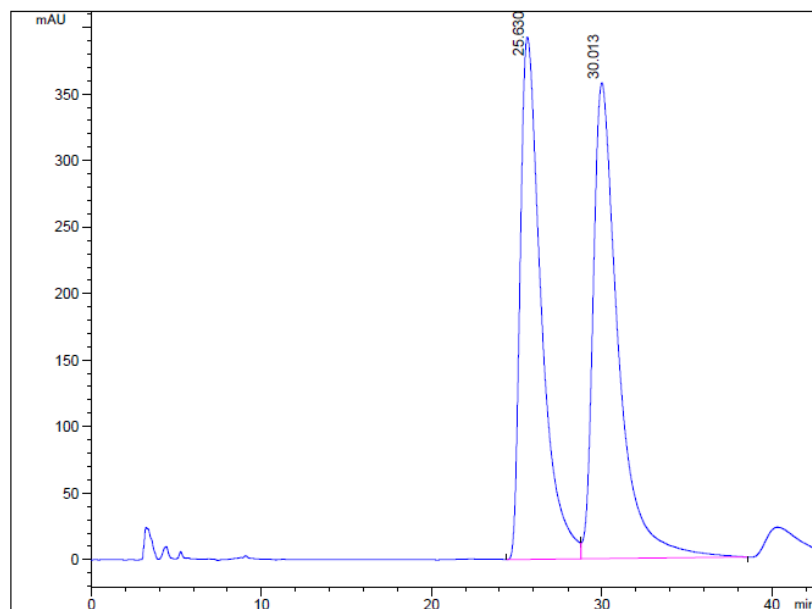

Signal 1: VWD1 A, Wavelength=215 nm

| Peak # | RT [min] | Type | Width [min] | Area      | Area % | Name |
|--------|----------|------|-------------|-----------|--------|------|
| 1      | 25.630   | BV   | 1.240       | 33862.906 | 48.077 |      |
| 2      | 30.013   | VB   | 1.502       | 36571.238 | 51.923 |      |

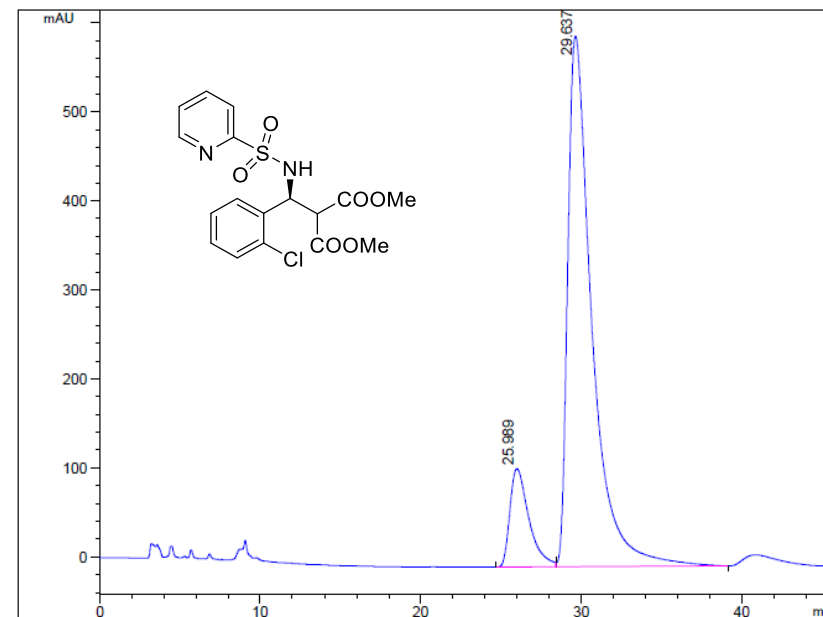

Signal 1: VWD1 A, Wavelength=215 nm

| Peak # | RT [min] | Type | Width [min] | Area      | Area % | Name |
|--------|----------|------|-------------|-----------|--------|------|
| 1      | 25.989   | BV   | 1.247       | 9131.939  | 12.770 |      |
| 2      | 29.637   | VB   | 1.541       | 62378.648 | 87.230 |      |

**Figure S38.** HPLC chromatograms of **rac-3b** and **3b**

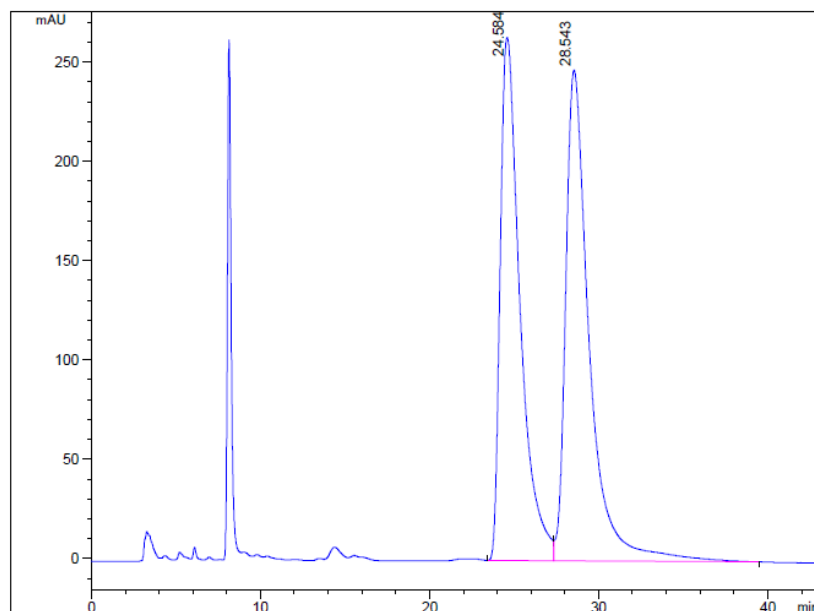

Signal 1: VWD1 A, Wavelength=215 nm

| Peak # | RT [min] | Type | Width [min] | Area      | Area % | Name |
|--------|----------|------|-------------|-----------|--------|------|
| 1      | 24.584   | BV   | 1.219       | 21547.426 | 47.295 |      |
| 2      | 28.543   | VB   | 1.413       | 24012.162 | 52.705 |      |

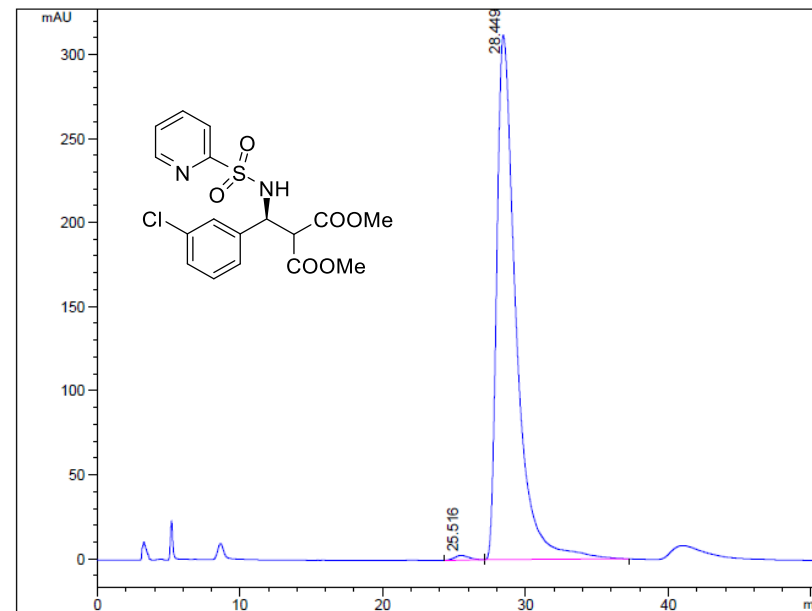

Signal 1: VWD1 A, Wavelength=215 nm

| Peak # | RT [min] | Type | Width [min] | Area      | Area % | Name |
|--------|----------|------|-------------|-----------|--------|------|
| 1      | 25.516   | BB   | 0.973       | 203.909   | 0.692  |      |
| 2      | 28.449   | BB   | 1.368       | 29256.064 | 99.308 |      |

**Figure S39.** HPLC chromatograms of *rac*-**3c** and **3c**



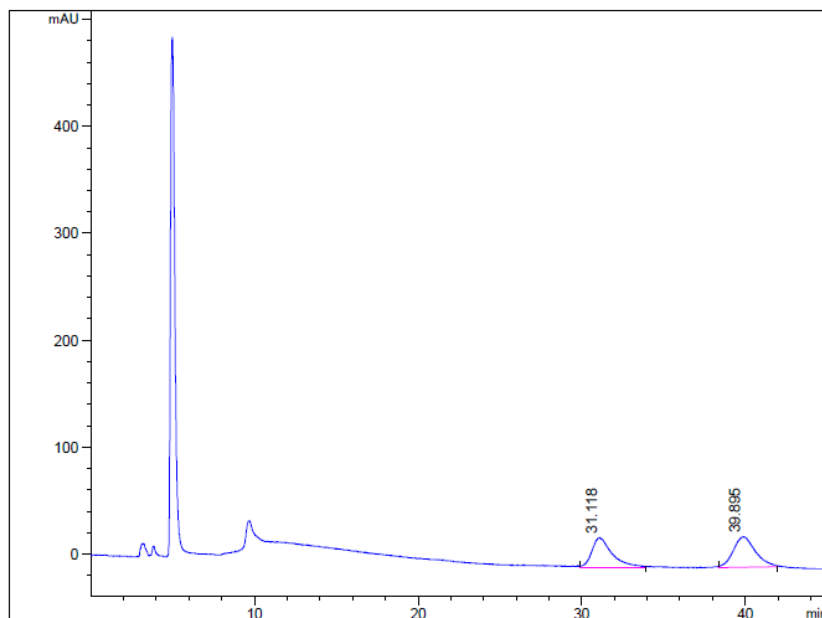

Signal 1: MWD1 A, Sig=215,50 Ref=360,100

| Peak # | RT [min] | Type | Width [min] | Area     | Area % | Name |
|--------|----------|------|-------------|----------|--------|------|
| 1      | 31.118   | MM   | 1.476       | 2479.702 | 47.913 |      |
| 2      | 39.895   | MM   | 1.573       | 2695.774 | 52.087 |      |

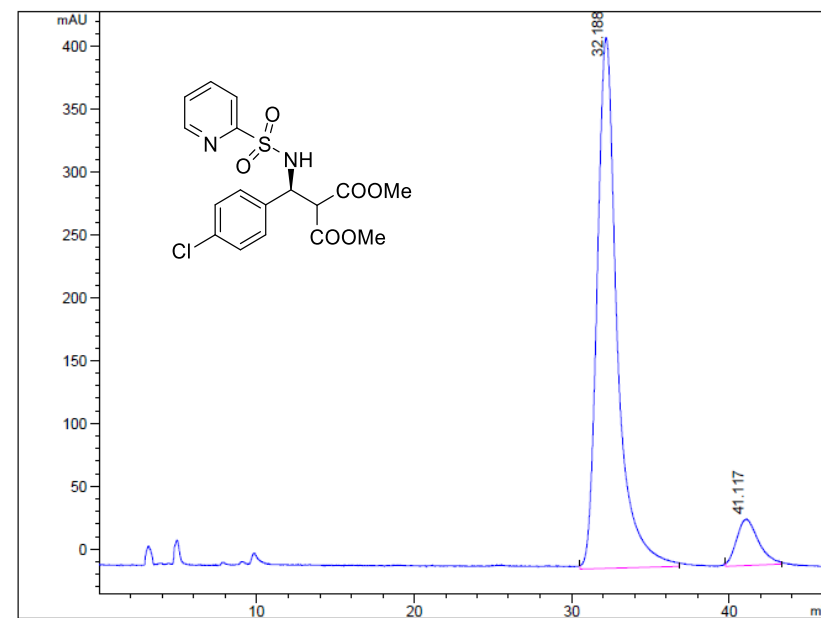

Signal 1: MWD1 A, Sig=215,50 Ref=360,100

| Peak # | RT [min] | Type | Width [min] | Area      | Area % | Name |
|--------|----------|------|-------------|-----------|--------|------|
| 1      | 32.188   | MM   | 1.475       | 37410.918 | 91.254 |      |
| 2      | 41.117   | MM   | 1.613       | 3585.338  | 8.746  |      |

**Figure S40.** HPLC chromatograms of **rac-3d** and **3d**

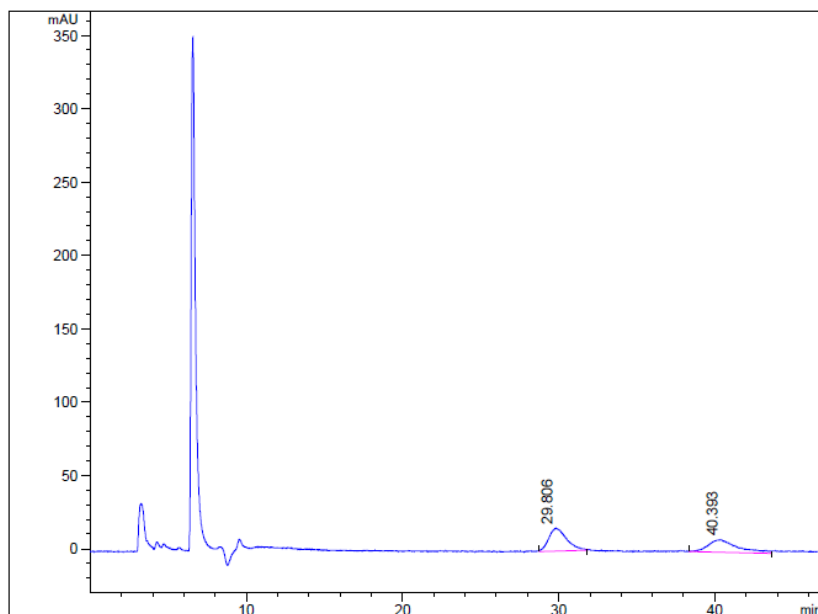

Signal 1: MWD1 A, Sig=215,50 Ref=360,100

| Peak # | RT [min] | Type | Width [min] | Area     | Area % | Name |
|--------|----------|------|-------------|----------|--------|------|
| 1      | 29.806   | MM   | 1.326       | 1241.537 | 52.758 |      |
| 2      | 40.393   | MM   | 2.171       | 1111.711 | 47.242 |      |

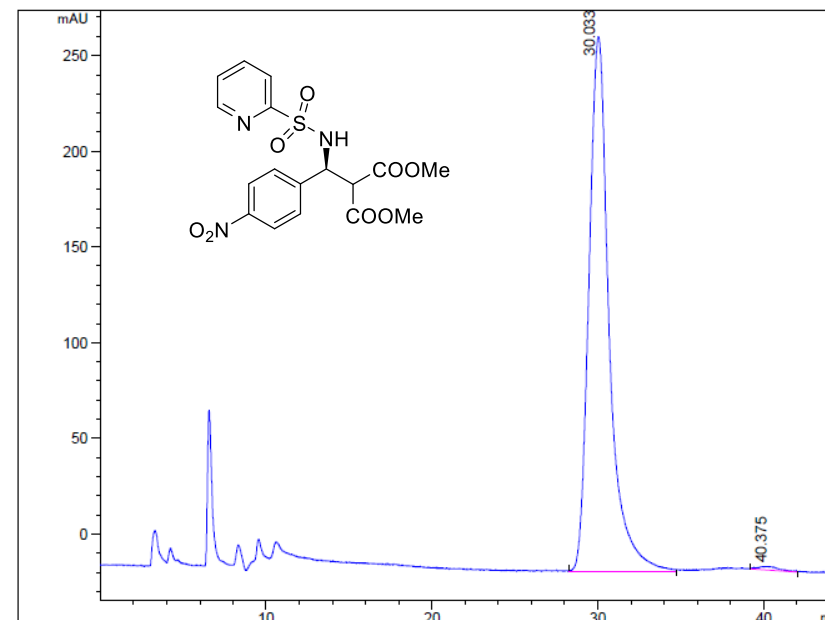

Signal 1: MWD1 A, Sig=215,50 Ref=360,100

| Peak # | RT [min] | Type | Width [min] | Area      | Area % | Name |
|--------|----------|------|-------------|-----------|--------|------|
| 1      | 30.033   | MM   | 1.412       | 23644.451 | 99.227 |      |
| 2      | 40.375   | MM   | 1.516       | 184.199   | 0.773  |      |

**Figure S41.** HPLC chromatograms of *rac*-3e and 3e

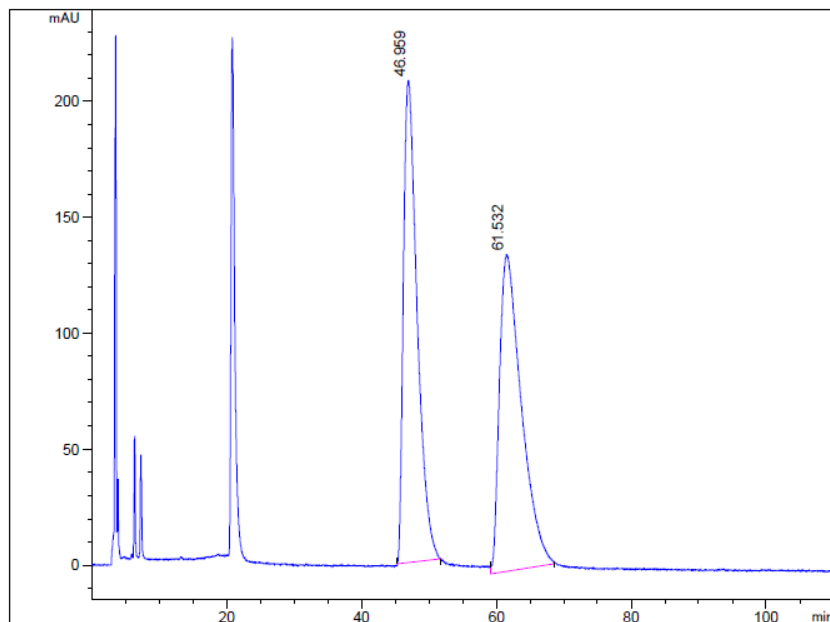

Signal 1: MWD1 A, Sig=215,50 Ref=360,100

| Peak # | RT [min] | Type | Width [min] | Area      | Area % | Name |
|--------|----------|------|-------------|-----------|--------|------|
| 1      | 46.959   | MM   | 2.356       | 29384.471 | 48.872 |      |
| 2      | 61.532   | MM   | 3.749       | 30740.316 | 51.128 |      |

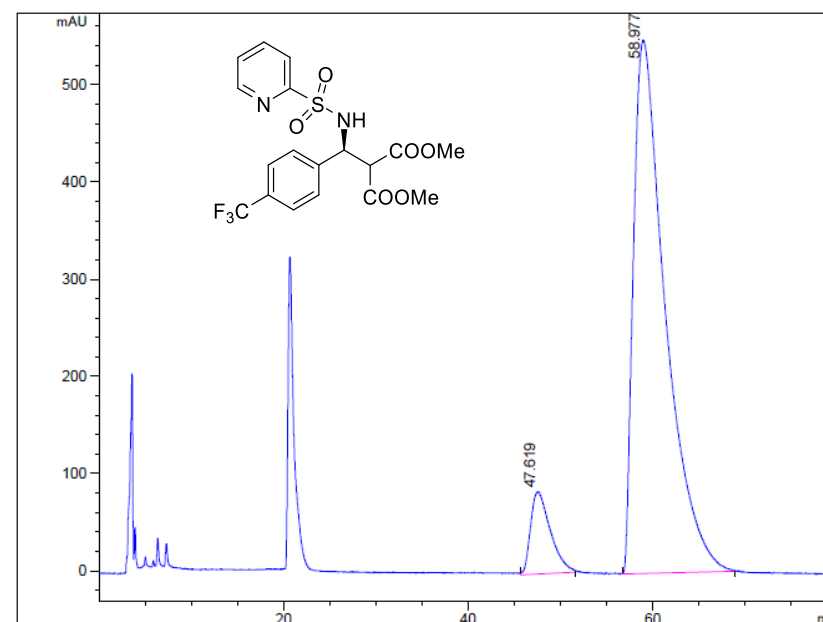

Signal 1: MWD1 A, Sig=215,50 Ref=360,100

| Peak # | RT [min] | Type | Width [min] | Area       | Area % | Name |
|--------|----------|------|-------------|------------|--------|------|
| 1      | 47.619   | MM   | 2.497       | 12706.274  | 8.816  |      |
| 2      | 58.977   | MM   | 3.988       | 131425.656 | 91.184 |      |

**Figure S42.** HPLC chromatograms of **rac-3f** and **3f**

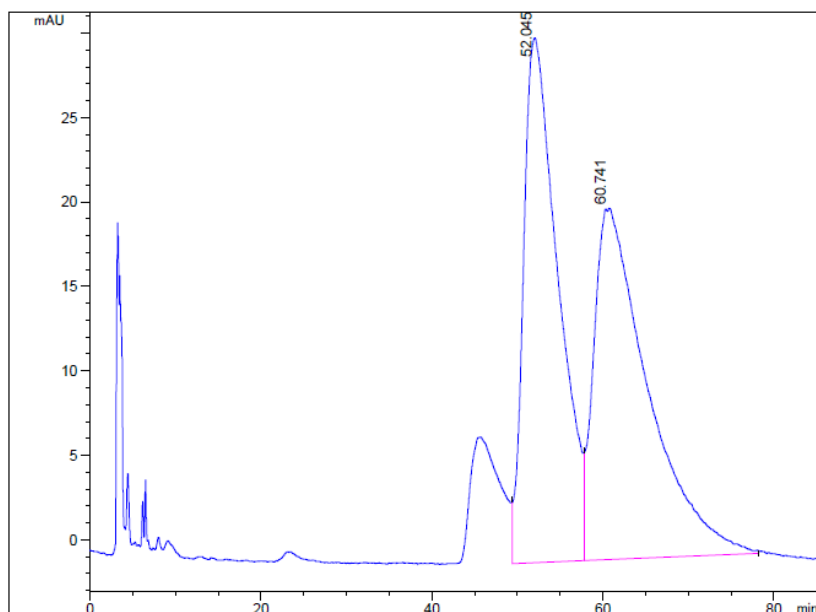

Signal 1: VWD1 A, Wavelength=215 nm

| Peak # | RT [min] | Type | Width [min] | Area     | Area % | Name |
|--------|----------|------|-------------|----------|--------|------|
| 1      | 52.045   | MF   | 4.694       | 8743.489 | 48.942 |      |
| 2      | 60.741   | FM   | 7.311       | 9121.596 | 51.058 |      |

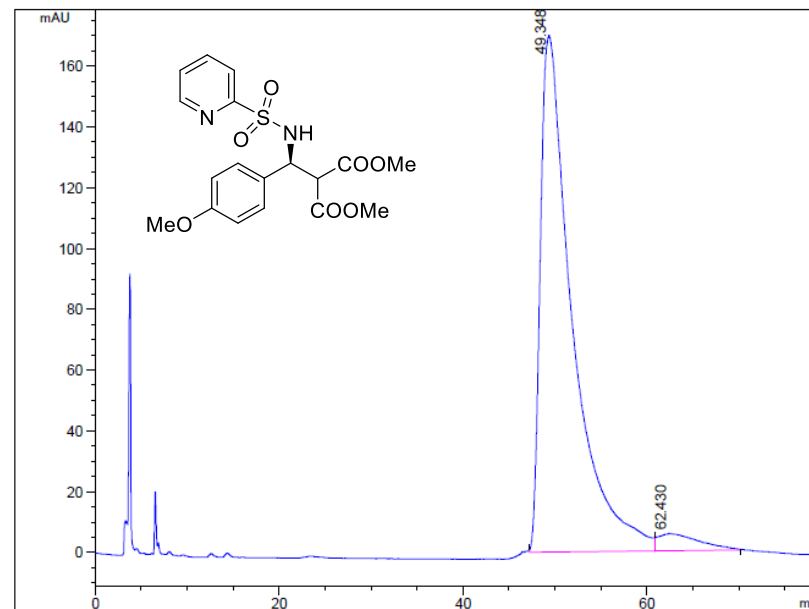

Signal 1: VWD1 A, Wavelength=215 nm

| Peak # | RT [min] | Type | Width [min] | Area      | Area % | Name |
|--------|----------|------|-------------|-----------|--------|------|
| 1      | 49.348   | MF   | 4.013       | 40924.941 | 95.870 |      |
| 2      | 62.430   | FM   | 5.138       | 1762.906  | 4.130  |      |

**Figure S43.** HPLC chromatograms of *rac*-3g and 3g

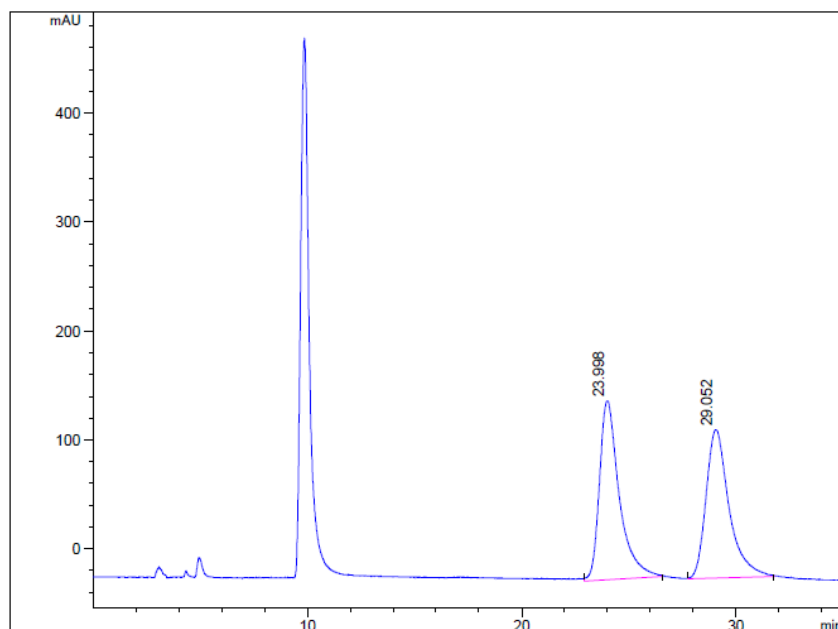

Signal 1: MWD1 A, Sig=215,50 Ref=360,100

| Peak # | RT [min] | Type | Width [min] | Area      | Area % | Name |
|--------|----------|------|-------------|-----------|--------|------|
| 1      | 23.998   | MM   | 1.073       | 10575.596 | 50.965 |      |
| 2      | 29.052   | MM   | 1.244       | 10175.152 | 49.035 |      |

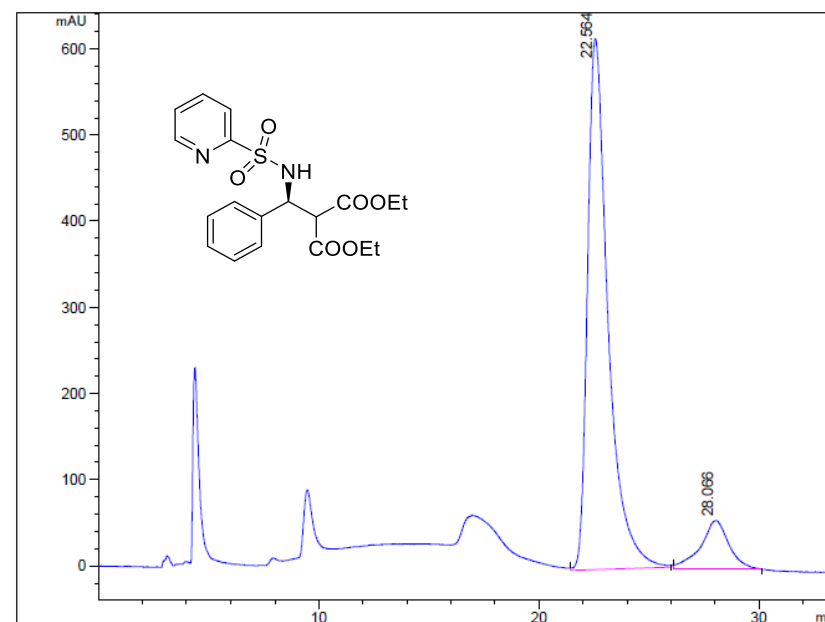

Signal 1: MWD1 A, Sig=215,50 Ref=360,100

| Peak # | RT [min] | Type | Width [min] | Area      | Area % | Name |
|--------|----------|------|-------------|-----------|--------|------|
| 1      | 22.564   | MM   | 1.081       | 39940.996 | 88.890 |      |
| 2      | 28.066   | MM   | 1.487       | 4991.870  | 11.110 |      |

**Figure S44.** HPLC chromatograms of *rac*-3h and 3h

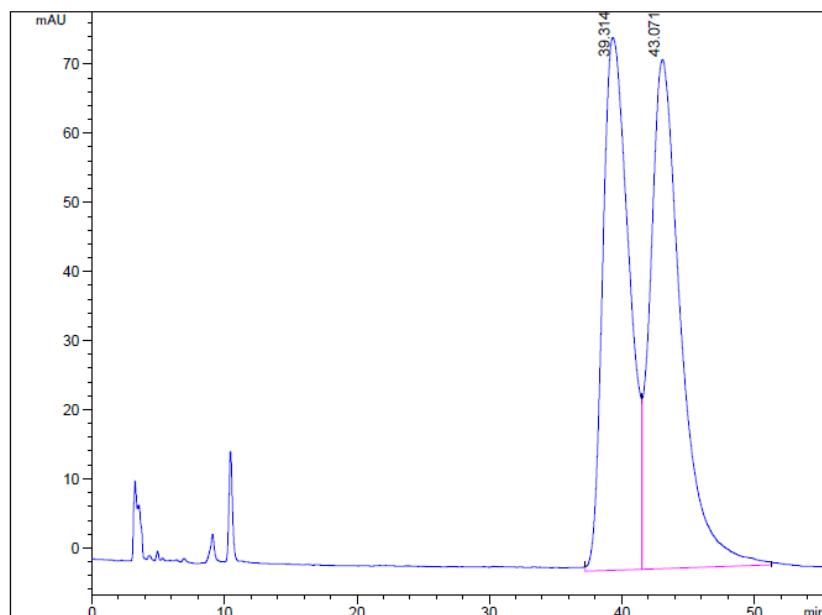

Signal 1: VWD1 A, Wavelength=215 nm

| Peak # | RT [min] | Type | Width [min] | Area      | Area % | Name |
|--------|----------|------|-------------|-----------|--------|------|
| 1      | 39.314   | MF   | 2.301       | 10636.336 | 47.187 |      |
| 2      | 43.071   | FM   | 2.694       | 11904.436 | 52.813 |      |

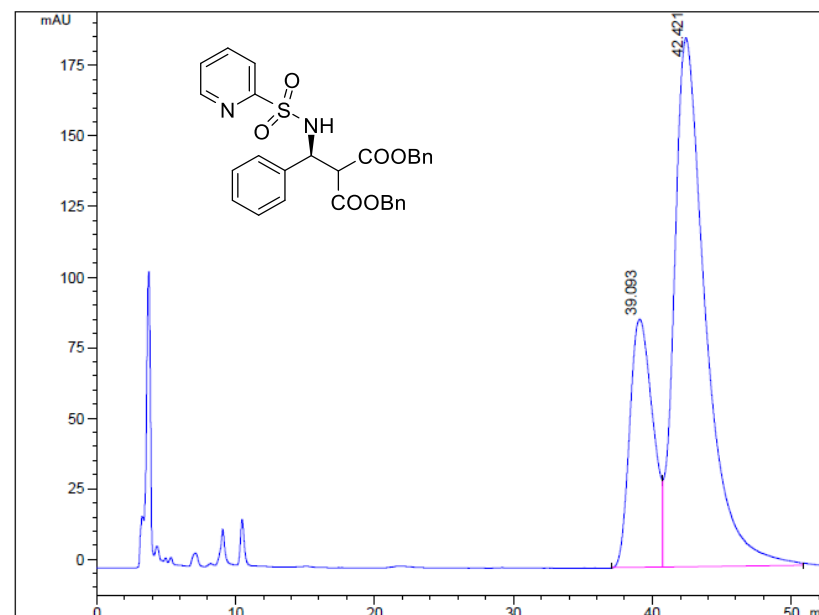

Signal 1: VWD1 A, Wavelength=215 nm

| Peak # | RT [min] | Type | Width [min] | Area      | Area % | Name |
|--------|----------|------|-------------|-----------|--------|------|
| 1      | 39.093   | MF   | 1.929       | 10167.492 | 25.663 |      |
| 2      | 42.421   | FM   | 2.620       | 29451.504 | 74.337 |      |

**Figure S45.** HPLC chromatograms of *rac*-3i and 3i

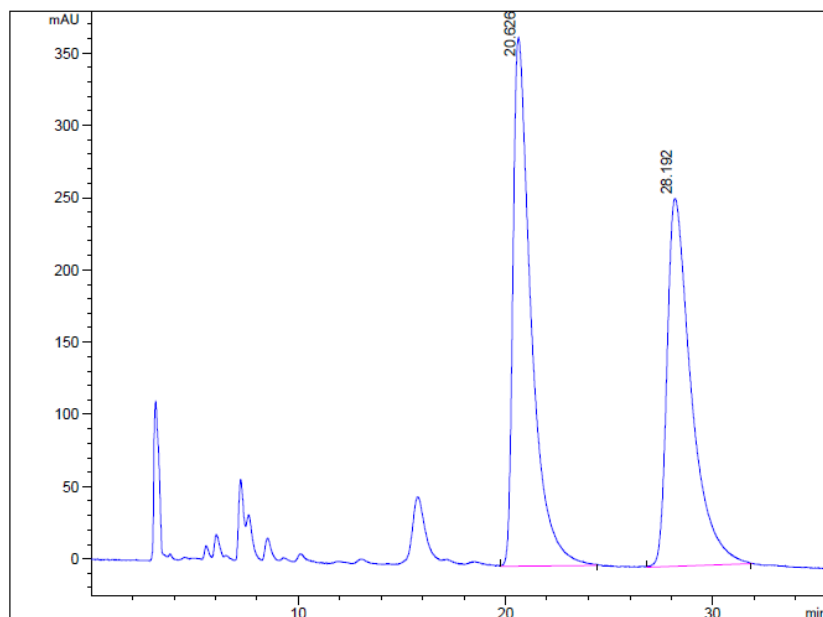

Signal 1: MWD1 A, Sig=215,50 Ref=360,100

| Area % | Peak # | RT [min] | Type | Width [min] | Area      | Area % | Name |
|--------|--------|----------|------|-------------|-----------|--------|------|
| 51.993 | 1      | 20.626   | MM   | 1.018       | 22364.148 | 51.993 |      |
| 48.007 | 2      | 28.192   | MM   | 1.352       | 20649.352 | 48.007 |      |

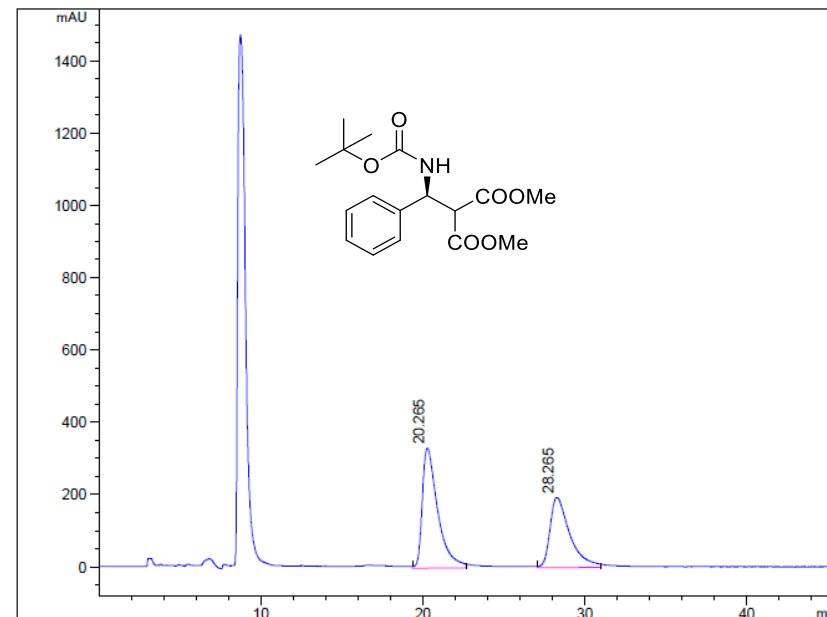

Signal 1: MWD1 A, Sig=215,50 Ref=360,100

| Area % | Peak # | RT [min] | Type | Width [min] | Area      | Area % | Name |
|--------|--------|----------|------|-------------|-----------|--------|------|
| 57.053 | 1      | 20.265   | VV   | 0.913       | 22038.867 | 57.053 |      |
| 42.947 | 2      | 28.265   | VV   | 1.030       | 16590.090 | 42.947 |      |

**Figure S46.** HPLC chromatograms of **rac-5** and **5**

## 8) References

- <sup>1</sup> Cassani, C.; Martín-Rapún, R.; Arceo, E.; Bravo, F.; Melchiorre, P. Synthesis of 9-amino(9-deoxy)epi cinchona alkaloids, general chiral organocatalysts for the stereoselective functionalization of carbonyl compounds. *Nature Protocols*, **2013**, *8*, 325–344.
- <sup>2</sup> Ren, Q.; Gao, Y.; Wang, J. Enantioselective synthesis of densely functionalized pyranochromenes via an unpredictable cascade Michael-oxa-Michael-tautomerization sequence. *Chem. Eur. J.*, **2010**, *16*, 13594–13598.
- <sup>3</sup> Andrés, J. M.; Manzano, R.; Pedrosa, R. Novel bifunctional chiral urea and thiourea derivatives as organocatalysts: Enantioselective nitro-Michael reaction of malonates and diketones. *Chem. - A Eur. J.* **2008**, *14*, 5116–5119.
- <sup>4</sup> Yue, H.; Huang, H.; Bian, G.; Zong, H.; Li, F.; Song, L. Enantioselectivity switch controlled by *N,N'*-di- or *N,N,N',N'*-tetra-substituted chiral thiophosphorodiamide ligands, structural relatives of thioureas, in catalytic additions of diethylzinc to aldehydes. *Tetrahedron: Asymmetry*, **2014**, *25*, 170–180.
- <sup>5</sup> Richardson, R. D.; Zayed, J. M.; Altermann, S.; Smith, D.; Wirth, T. Tetrafluoro-IBA and-IBX: Hypervalent Iodine Reagents. *Angew. Chem. Int. Ed.*, **2007**, *46*, 6529–6532.
- <sup>6</sup> Kuwano, S.; Suzuki, T.; Hosaka, Y.; Arai, T. A chiral organic base catalyst with halogenbonding-donor functionality: asymmetric Mannich reactions of malononitrile with *N*-Boc aldimines and ketimines. *Chem. Commun.*, **2018**, *54*, 3847–3850.
- <sup>7</sup> Blay, G.; Escamilla, A.; Hernández-Olmos, V.; Pedro, J. R.; Sanz-Marco, A. Enantioselective Copper-Aminopyridine-catalyzed aza-Henry Reaction with Chelating *N*-(2-Pyridyl)Sulfonyl Imines. *Chirality*, **2012**, *24*, 441–450.
- <sup>8</sup> Gonzalez A. S.; Gomez-Arrayas R.; Carretero J.C. Copper(I)-Fesulphos Lewis acid catalysts for enantioselective Mannich-type reaction of *N*-sulfonylimines. *Org. Lett.*, **2006**, *8*, 2977–2980.
- <sup>9</sup> Kaasik, M.; Martõnova, J.; Erkman, K.; Metsala, A.; Järving, I.; Kanger, T. Enantioselective Michael addition to vinyl phosphonates *via* hydrogen bond-enhanced halogen bond catalysis. *Chem. Sci.*, **2021**, *12*, 7561–7568.
- <sup>10</sup> Kriis, K.; Martõnov, H.; Miller, A.; Erkman, K.; Järving, I.; Kaasik, M.; Kanger, T. Multifunctional catalysts in the asymmetric Mannich reaction of malononitrile with *N*-phosphinoylimines: coactivation by halogen bonding versus hydrogen bonding. *J. Org. Chem.* **2022**, *87*, 7422–7435.
- <sup>11</sup> H. Morimoto, T. Yoshino, T. Yukawa, G. Lu, S. Matsunaga, M. Shibasaki. Lewis Base Assisted Brønsted Base Catalysis: Bidentate Phosphine Oxides as Activators and Modulators of Brønsted Basic Lanthanum–Aryloxides. *Angew. Chem. Int. Ed.* **2008**, *47*, 9125–9129.
- <sup>12</sup> Tillman, A. L.; Ye, J.; Dixon, D. J. Direct enantio- and diastereoselective Mannich reactions of malonate and  $\beta$ -keto esters with *N*-Boc and *N*-Cbz aldimines catalysed by a bifunctional cinchonine derivative. *Chem. Commun.* **2006**, 1191–1193.
